# Supplementary material for: New Artificial Biomimetic Enzyme Analogues Based on Iron(II/III) Schiff Base Complexes: An Effect of (Benz)imidazole Organic Moieties on Phenoxazinone Synthase and DNA Recognition
Source: PubMed Central journal article supplement (PMC6749401; doi:10.3390/molecules24173173), 2019-08-31
Supplement: molecules-24-03173-s001.pdf [file molecules-24-03173-s001.pdf]

## Electronic Supplementary Information for

**New artificial biomimetic enzyme analogues based on iron(II/III) Schiff Base complexes: an effect of (benz)imidazole organic moieties on phenoxazinone synthase and DNA recognition**

**Aleksandra Bocian<sup>1‡</sup>, Martyna Szymańska<sup>1‡</sup>, Daria Brykczyńska<sup>1</sup>, Maciej Kubicki<sup>1</sup>, Monika Wałęsa-Chorab<sup>1</sup>, Giovanni N. Roviello<sup>2</sup>, Marta A. Fik-Jaskółka<sup>1\*</sup>, Adam Gorczyński<sup>1\*</sup>, Violetta Patroniak<sup>1</sup>**

<sup>1</sup> Faculty of Chemistry, Adam Mickiewicz University, Uniwersytetu Poznańskiego 8, 61-614 Poznań, Poland

<sup>2</sup> Institute of Biostructures and Bioimaging – CNR, via Mezzocannone 16, 80134 Napoli, Italy

**#co-authors contributed equally**

\* adam.gorczynski@amu.edu.pl; martafik@amu.edu.pl

### Table of contents

|                                                                                  |    |
|----------------------------------------------------------------------------------|----|
| 1. <sup>1</sup> H NMR, <sup>13</sup> C NMR spectra of ligands and complexes..... | 2  |
| 2. ESI-MS spectra of ligand and complexes .....                                  | 10 |
| 3. Crystal data and structure of complexes.....                                  | 19 |
| 4. Spectra of the oxidation reactions .....                                      | 24 |
| 5. Biological spectra .....                                                      | 28 |

# 1. $^1\text{H}$ NMR, $^{13}\text{C}$ NMR spectra of ligands and complexes

**Fig. S1a.**  $^1\text{H}$  NMR spectra for ligand  $\text{L}^1$  measured in  $(\text{CD}_3)_2\text{SO}$ .

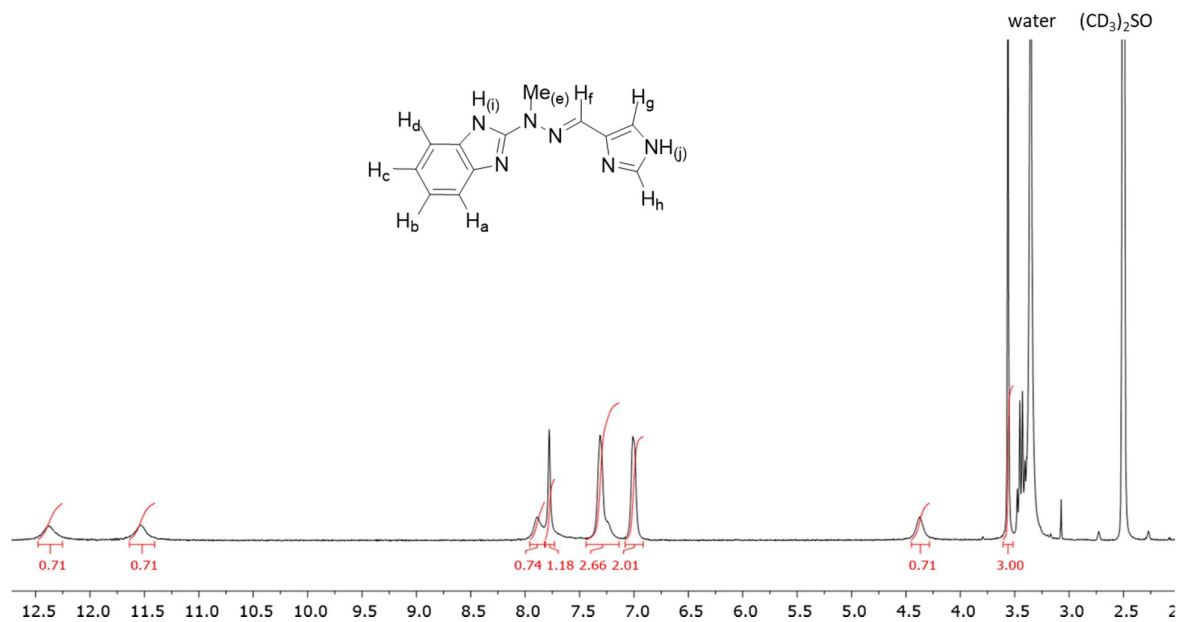

$^1\text{H}$  NMR ( $(\text{CD}_3)_2\text{SO}$ , 300 MHz):  $\delta$  (ppm) – 12.38 (s, 0.7H,  $\text{NH}_{(i/j)}$ ); 11.53 (s, 0.7H,  $\text{NH}_{(i/j)}$ ); 7.89 (s, 1H,  $\text{H}_h$ ); 7.78 (s, 1H,  $\text{H}_i$ ); 7.31 (s, 3H,  $\text{H}_{b,c,g}$ ); 7.01 (s, 2H,  $\text{H}_{a,d}$ ); 4.37 (s, 0.7H,  $\text{NH}_{(i/j)}$ ); 3.56 (s,  $\text{Me}_{(e)}$ ).

**Fig. S1b.**  $^1\text{H}$  NMR spectra for ligand  $\text{L}^1$  measured in  $(\text{CD}_3)_2\text{SO}$  with  $\text{K}_2\text{CO}_3$ .

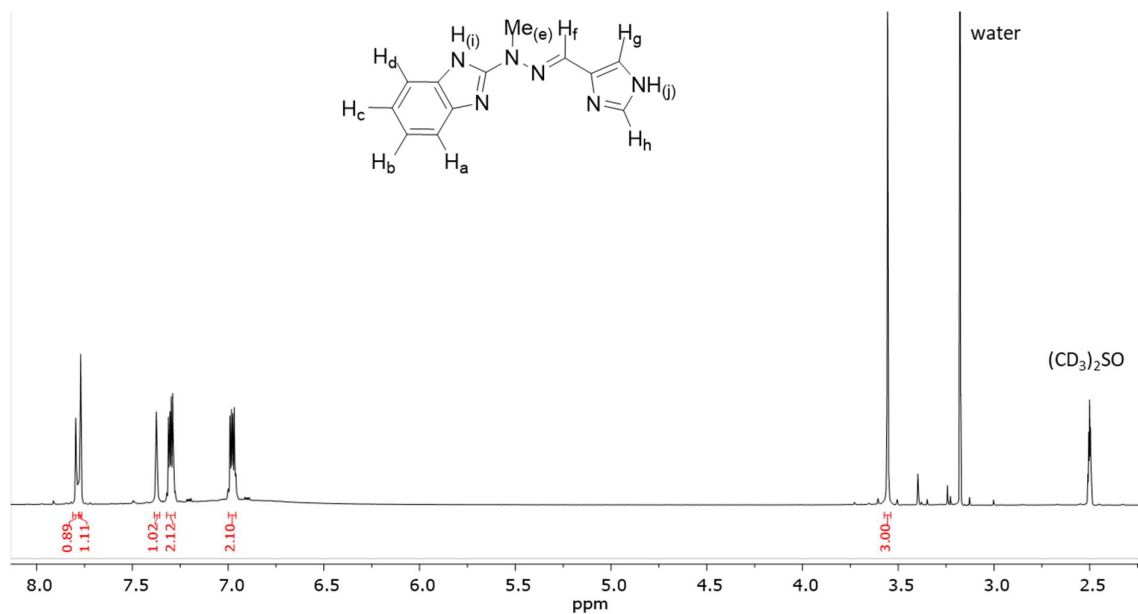

$^1\text{H}$  NMR ( $(\text{CD}_3)_2\text{SO} + \text{K}_2\text{CO}_3$ , 400 MHz)  $\delta$  = 7.80 (s, 1H,  $\text{H}_h$ ); 7.77 (s, 1H,  $\text{H}_i$ ); 7.38 (s, 1H,  $\text{H}_g$ ); 7.32-7.28 (dd, 2H,  $J = 5.8, 3.2$  Hz,  $\text{H}_{b,c}$ ); 7.00-6.96 (dd, 2H,  $J = 5.9, 3.2$  Hz,  $\text{H}_{a,d}$ ); 3.56 (s,  $\text{Me}_{(e)}$ ).

**Fig. S1c.** Comparison of  $^1\text{H}$  NMR spectra for ligand  $\text{L}^1$  measured in  $(\text{CD}_3)_2\text{SO}$  and in  $(\text{CD}_3)_2\text{SO}$  with  $\text{K}_2\text{CO}_3$ .

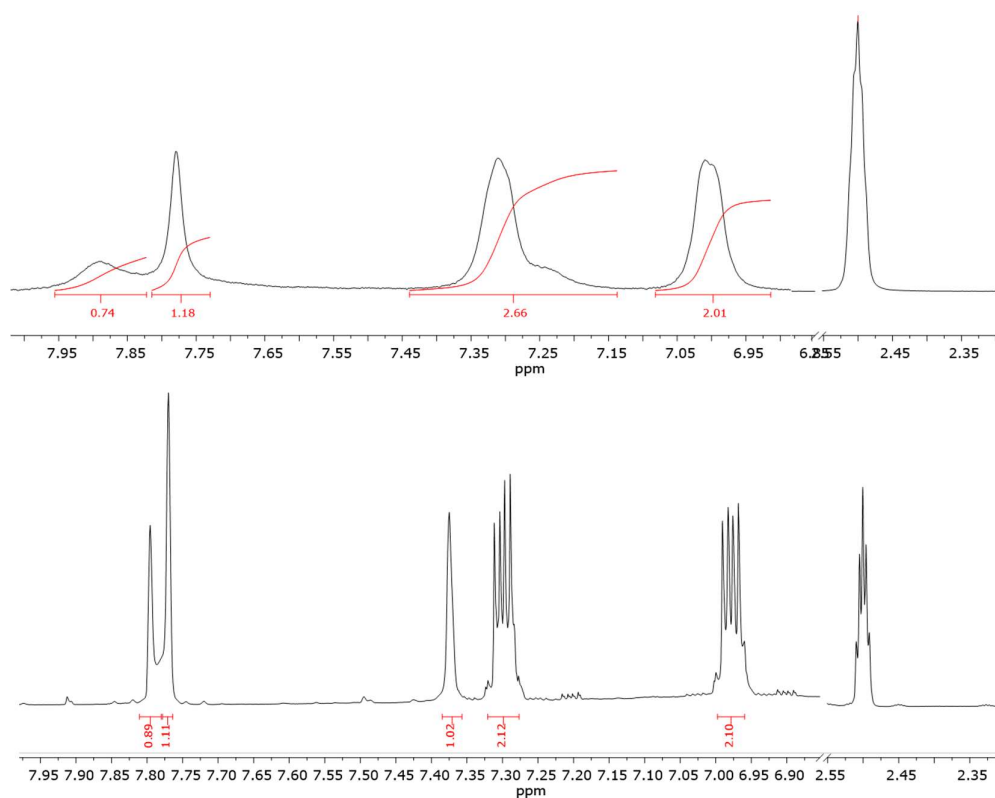

**Fig. S2.**  $^{13}\text{C}$  NMR spectra for ligand  $\text{L}^1$  measured in  $(\text{CD}_3)_2\text{SO}$ .

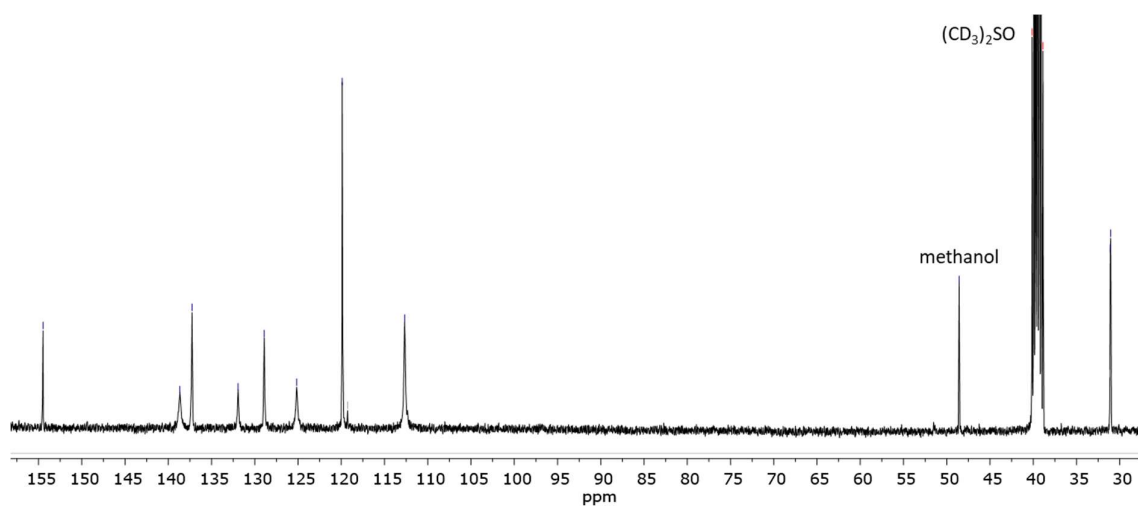

$^{13}\text{C}$  NMR ( $(\text{CD}_3)_2\text{SO} + \text{K}_2\text{CO}_3$ , 75 MHz):  $\delta$  (ppm) – 154.5, 138.7, 137.3, 131.9 (2C), 128.9, 125.2, 119.9 (2C), 112.7 (2C), 31.1.

**Fig. S3.**  $^1\text{H}$  NMR spectra for ligand  $\text{L}^2$  measured in  $(\text{CD}_3)_2\text{SO}$ .

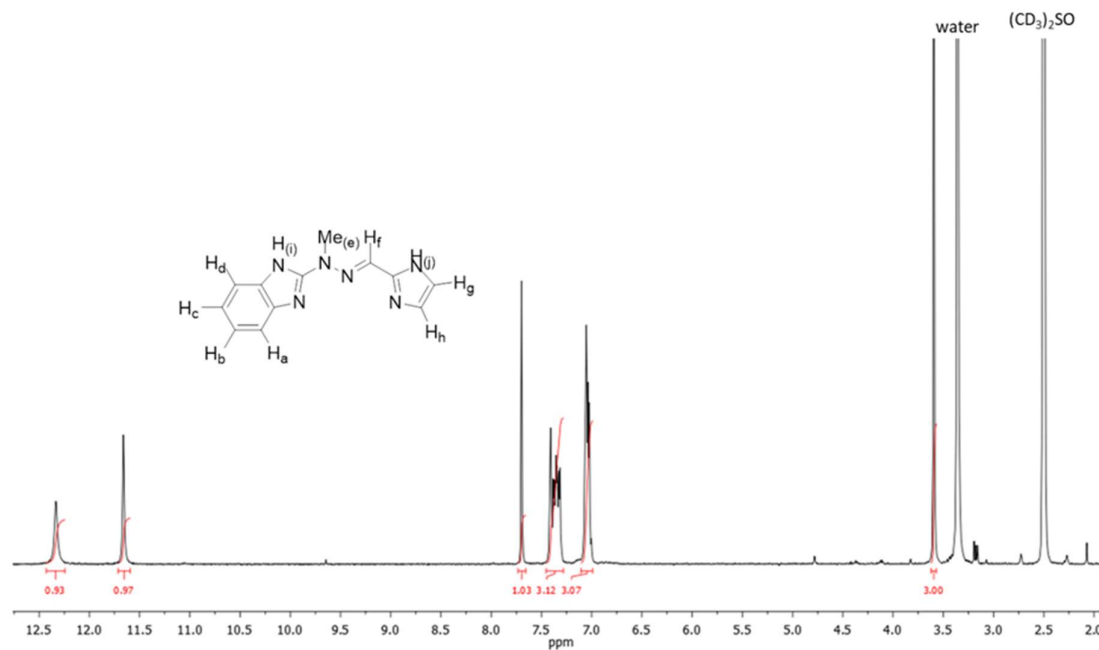

$^1\text{H}$  NMR ( $(\text{CD}_3)_2\text{SO}$ , 300 MHz):  $\delta$  (ppm) – 12.33 (s, 1H,  $\text{NH}_{(i)}$ ); 11.66 (s, 1H,  $\text{NH}_{(j)}$ ); 7.70 (s, 1H,  $\text{H}_f$ ); 7.45-7.28 (m, 3H,  $\text{H}_b, c, g$ ); 7.10-6.99 (m, 3H,  $\text{H}_a, d, h$ ); 3.59 (s,  $\text{Me}_{(e)}$ ).

**Fig. S4.**  $^{13}\text{C}$  NMR spectra for ligand  $\text{L}^2$  measured in  $(\text{CD}_3)_2\text{SO}$ .

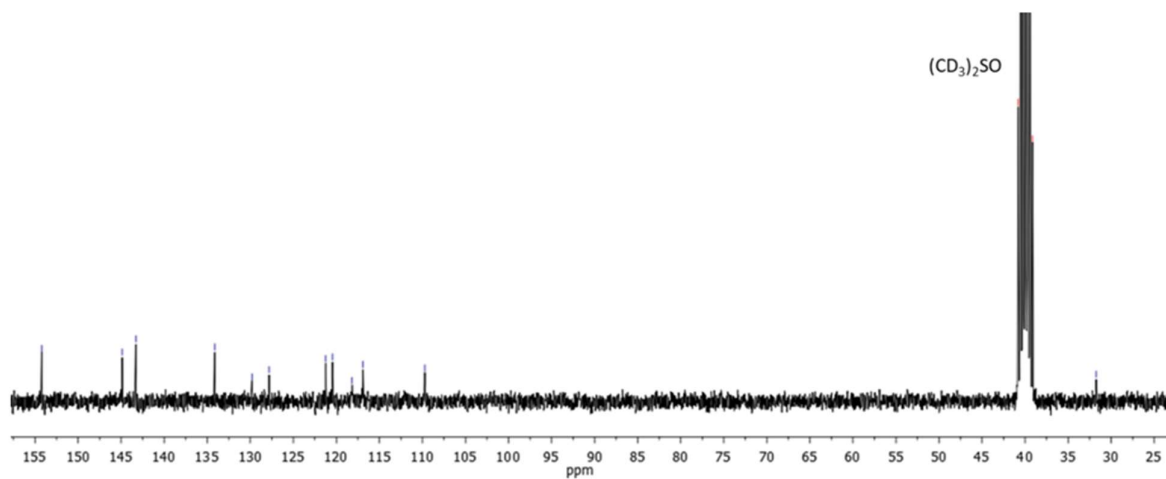

$^{13}\text{C}$  NMR ( $(\text{CD}_3)_2\text{SO}$ , 75 MHz):  $\delta$  (ppm) – 154.2, 144.9, 143.3, 134.1, 129.8, 127.8, 121.2, 120.4, 118.2, 116.9, 109.7, 31.7.

**Fig. S5.**  $^1\text{H}$  NMR spectra for ligand  $\text{L}^3$  measured in  $(\text{CD}_3)_2\text{SO}$ .

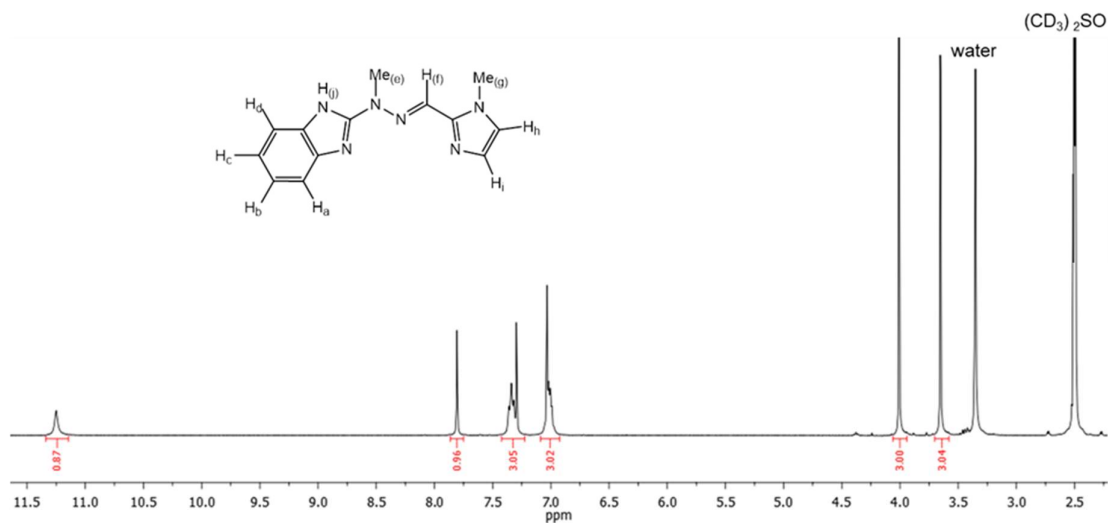

$^1\text{H}$  NMR ( $(\text{CD}_3)_2\text{SO}$ , 300 MHz):  $\delta$  (ppm) – 11.25 (s, 1H,  $\text{H}_j$ ), 7.81 (s, 1H,  $\text{H}_f$ ), 7.36-7.29 (m, 3H,  $\text{H}_b, c, h$ ), 7.04-6.99 (m, 3H,  $\text{H}_a, d, i$ ), 4.01 (s,  $\text{Me}_g$ ), 3.65 (s,  $\text{Me}_e$ ).

**Fig. S6.**  $^{13}\text{C}$  NMR spectra for ligand  $\text{L}^3$  measured in  $(\text{CD}_3)_2\text{SO}$ .

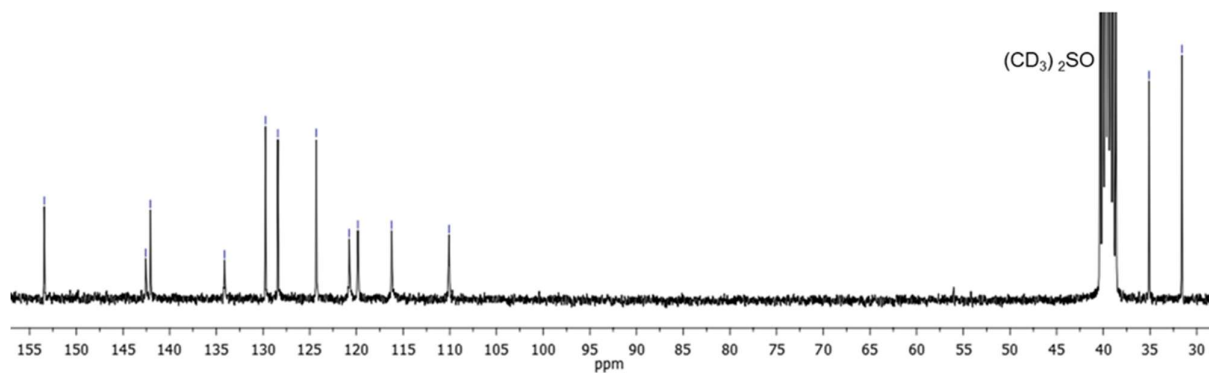

$^{13}\text{C}$  NMR ( $(\text{CD}_3)_2\text{SO}$ , 75 MHz):  $\delta$  (ppm) – 153.4, 142.6, 144.1, 134.1, 129.8, 128.4, 124.3, 120.8, 119.8, 116.2, 110.1, 35.1, 31.6.

**Fig. S7.**  $^1\text{H}$  NMR spectra for ligand  $\text{L}^4$  measured in  $\text{CDCl}_3$ .

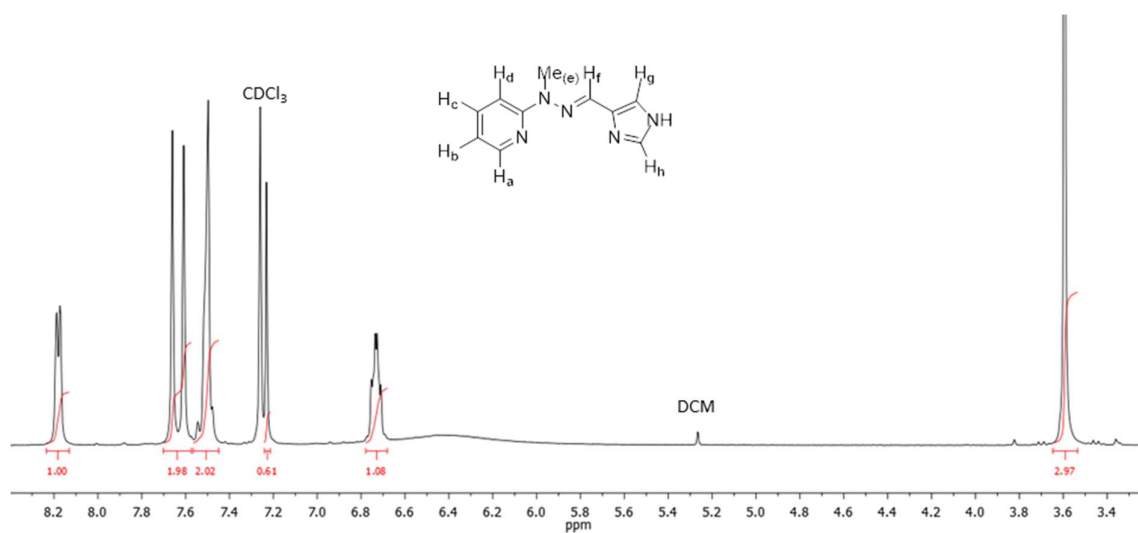

$^1\text{H}$  NMR ( $\text{CDCl}_3$ , 300 MHz):  $\delta$  (ppm) – 8.18 (d, 1H,  $J = 4.3$  Hz,  $H_a$ ); 7.66 (s, 1H,  $H_f$ ); 7.61 (s, 1H,  $H_h$ ); 7.56-7.47 (m, 2H,  $H_c, a$ ); 7.23 (s, 1H,  $H_g$ ); 6.73 (t, 1H,  $J = 5.0$  Hz,  $H_b$ ); 6.40 (s, broad, NH); 3.59 (s,  $\text{Me}(e)$ ).

**Fig. S8.**  $^{13}\text{C}$  NMR spectra for ligand  $\text{L}^4$  measured in  $\text{CDCl}_3$ .

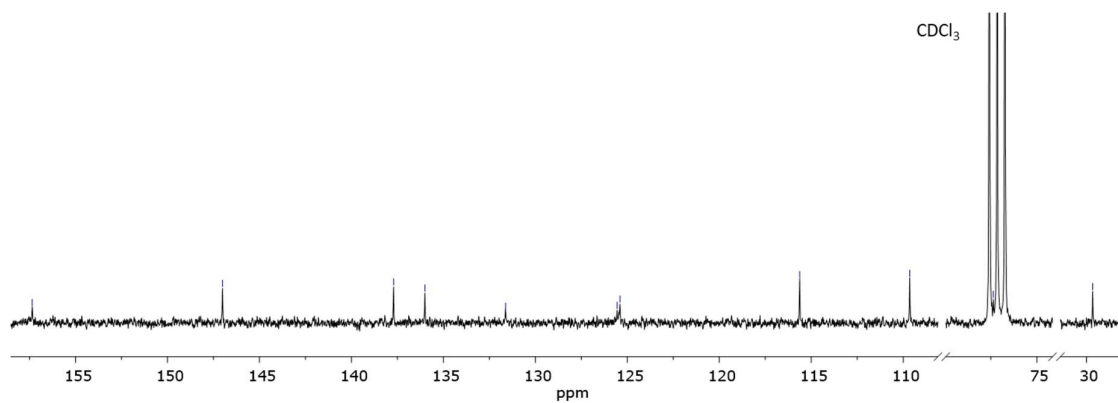

$^{13}\text{C}$  NMR ( $\text{CDCl}_3$ , 75 MHz):  $\delta$  (ppm) – 157.4, 147.0, 137.7, 136.0, 131.6, 125.6, 125.4, 115.6, 109.7, 29.7.

**Fig. S9.**  $^1\text{H}$  NMR spectra for ligand  $\text{L}^5$  measured in  $\text{CD}_3\text{OD}$ .

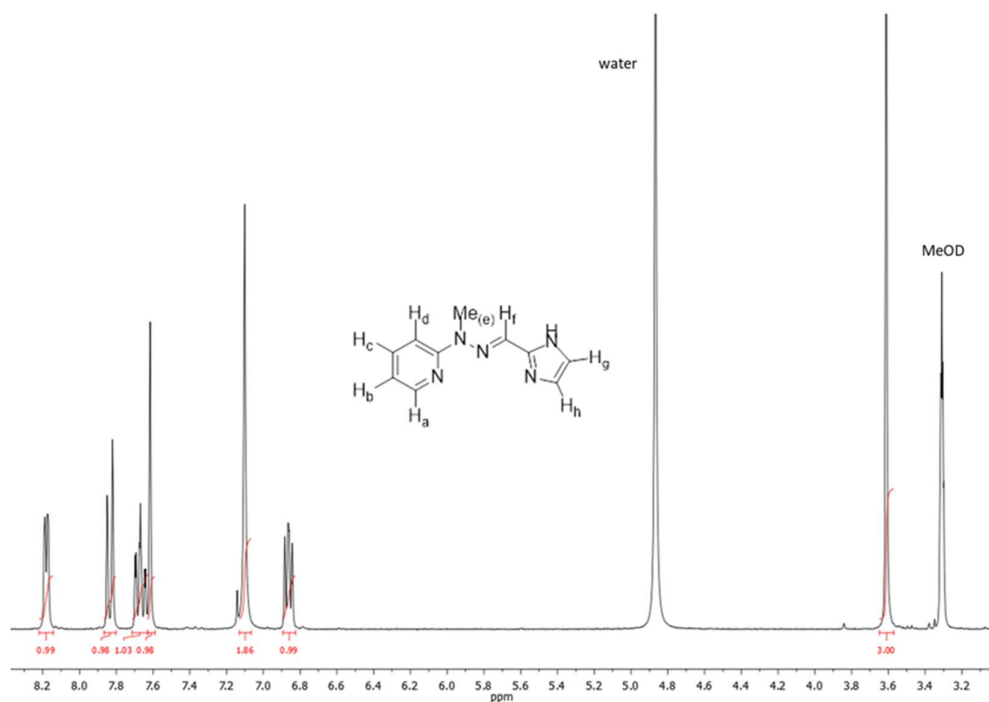

$^1\text{H}$  NMR ( $\text{CD}_3\text{OD}$ , 300 MHz):  $\delta$  (ppm) – 8.18 (d, 1H,  $J = 5.0$  Hz,  $\text{H}_a$ ); 7.83 (d, 1H,  $J = 8.6$  Hz,  $\text{H}_d$ ); 7.67 (t, 1H,  $J = 7.9$  Hz,  $\text{H}_c$ ); 7.62 (s, 1H,  $\text{H}_i$ ); 7.10 (s, 2H,  $\text{H}_g$ ,  $\text{H}_h$ ); 6.87 (t, 1H,  $J = 5.5$  Hz,  $\text{H}_b$ ); 3.61 (s,  $\text{Me}_{(e)}$ ).

**Fig. S10.**  $^{13}\text{C}$  NMR spectra for ligand  $\text{L}^5$  measured in  $\text{CD}_3\text{OD}$ .

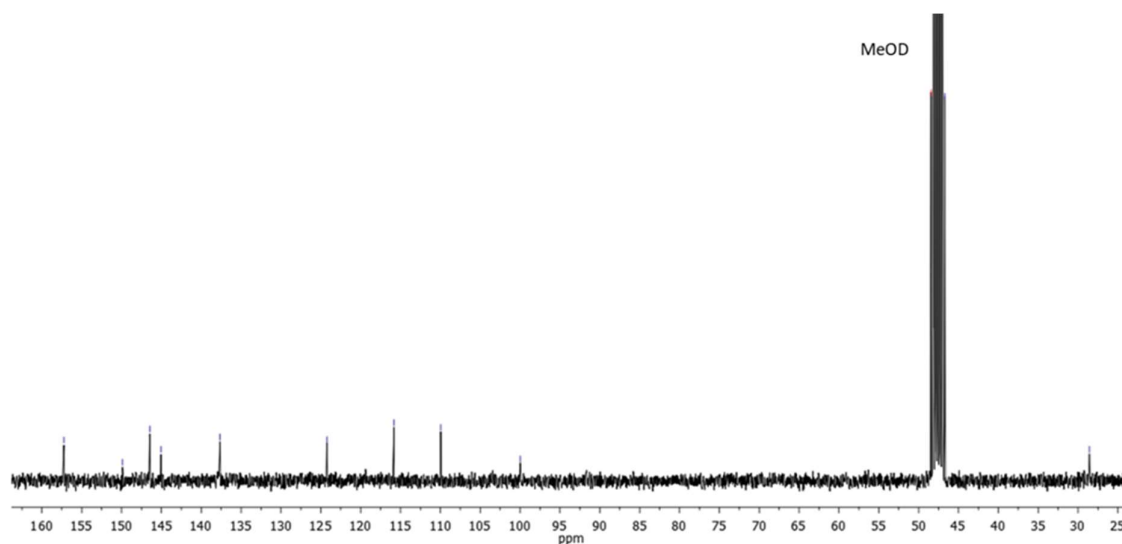

$^{13}\text{C}$  NMR ( $\text{CD}_3\text{OD}$ , 75 MHz):  $\delta$  (ppm) – 157.2, 149.9, 146.5, 145.1, 137.6, 124.2, 115.9, 109.9, 99.9, 28.6.

**Fig. S11.**  $^1\text{H}$  NMR spectra for complex **10** measured in  $\text{CD}_3\text{CN}$ .

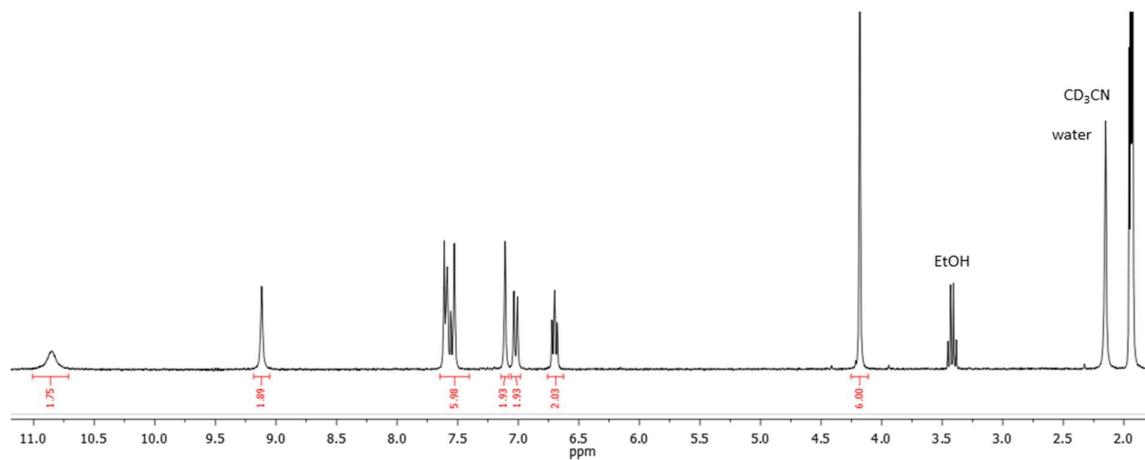

$^1\text{H}$  NMR ( $\text{CD}_3\text{CN}$ , 300 MHz):  $\delta$  (ppm) - 10.85 (s, 2H); 9.12 (s, 2H); 7.64-7.40 (m, 6H); 7.10 (s, 2H); 7.01 (d, 2H); 6.71 (t, 2H); 4.18 (s, 6H).

**Fig. S12.**  $^1\text{H}$  NMR spectra for complex **11** measured in  $\text{CD}_3\text{CN}$ .

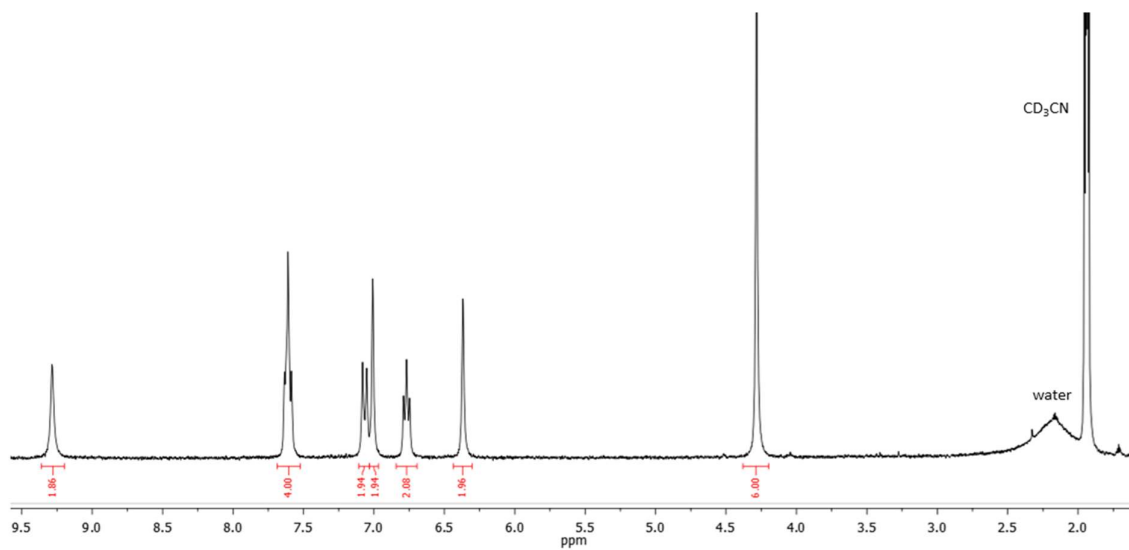

$^1\text{H}$  NMR ( $\text{CD}_3\text{CN}$ , 300 MHz):  $\delta$  (ppm) - 9.28 (s, 2H); 7.69-7.52 (m, 4H); 7.06 (d, 2H); 7.01 (s, 2H); 6.77 (t, 2H); 6.37 (s, 2H); 4.28 (s, 6H).



**Fig. S13.**  $^1\text{H}$  NMR spectra for complex **12** measured in  $\text{CD}_3\text{CN}$ .

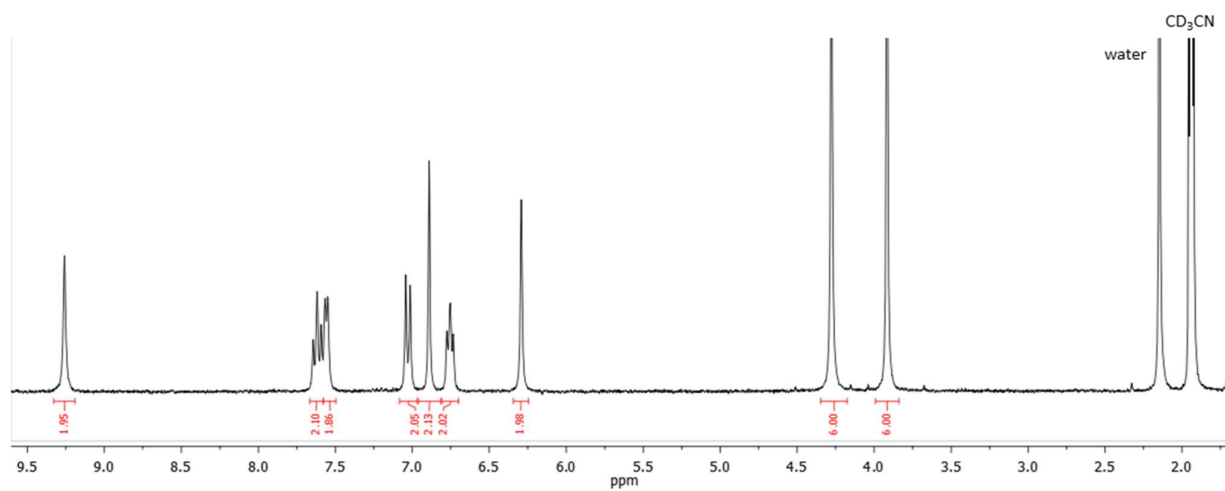

$^1\text{H}$  NMR ( $\text{CD}_3\text{CN}$ , 300 MHz):  $\delta$  (ppm) - 9.26 (s, 2H); 7.69 (t, 2H); 7.56 (d, 2H); 7.03 (d, 2H); 6.89 (s, 2H); 6.75 (t, 2H); 6.29 (s, 2H); 4.28 (s, 6H); 3.92 (s, 6H).

## 2. ESI-MS spectra of ligand and complexes

**Fig. S14.** ESI-MS spectra for ligand  $L^1$ .

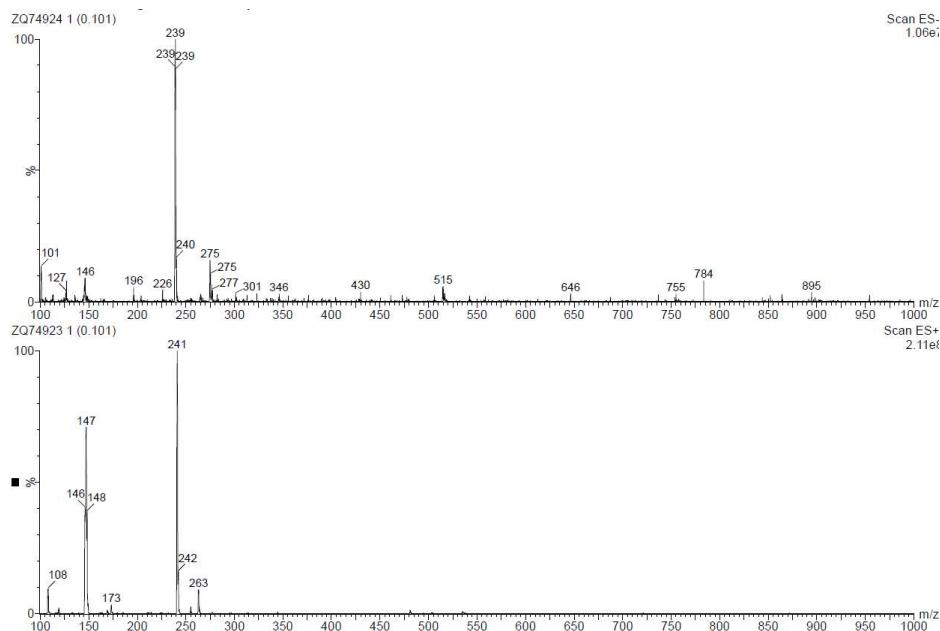

ESI-MS(+) m/z (%): 241 (100)  $[HL^1]^+$ , 263 (10)  $[NaL^1]^+$ ; ESI-MS(-): 239 (100)  $[L^1-H]^-$ .

**Fig. S15.** ESI-MS spectra for ligand  $L^2$ .

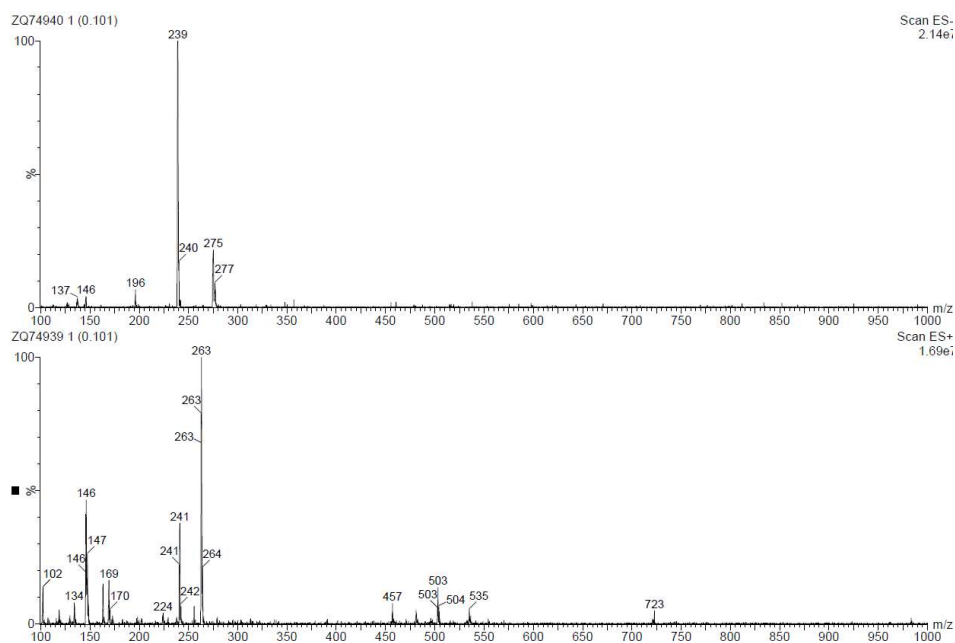

ESI-MS(+) m/z (%): 241 (40)  $[HL^2]^+$ , 263 (100)  $[NaL^2]^+$ ; ESI-MS(-): 239 (100)  $[L^2-H]^-$ .

**Fig. S16.** ESI-MS spectra for ligand **L<sup>3</sup>**.

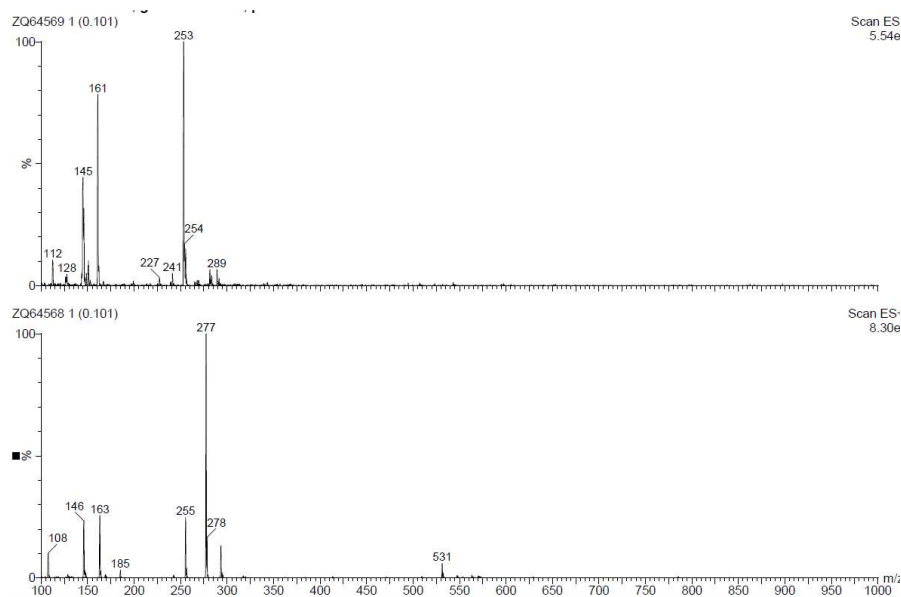

ESI-MS(+) m/z (%): 255 (30) [**HL<sup>3</sup>**]<sup>+</sup>, 277 (100) [**NaL<sup>3</sup>**]<sup>+</sup>; ESI-MS(-): 253 (100) [**L<sup>3</sup>-H**]<sup>-</sup>.

**Fig. S17.** ESI-MS spectra for ligand **L<sup>4</sup>**.

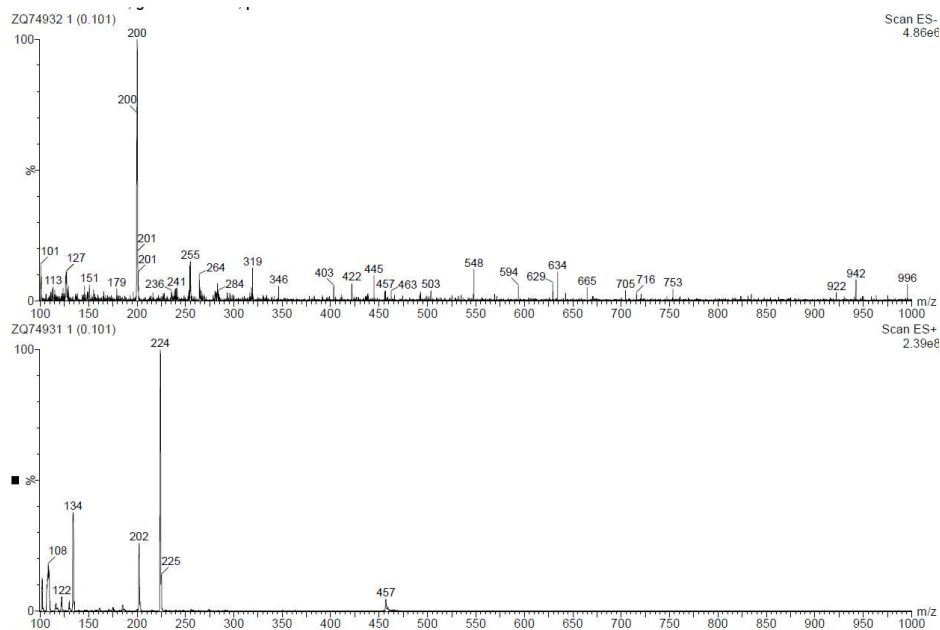

ESI-MS(+) m/z (%): 202 (20) [**HL<sup>4</sup>**]<sup>+</sup>, 224 (25) [**NaL<sup>4</sup>**]<sup>+</sup>; ESI-MS(-): 200 (100) [**L<sup>4</sup>-H**]<sup>-</sup>.

**Fig. S18.** ESI-MS spectra for ligand L<sup>5</sup>.

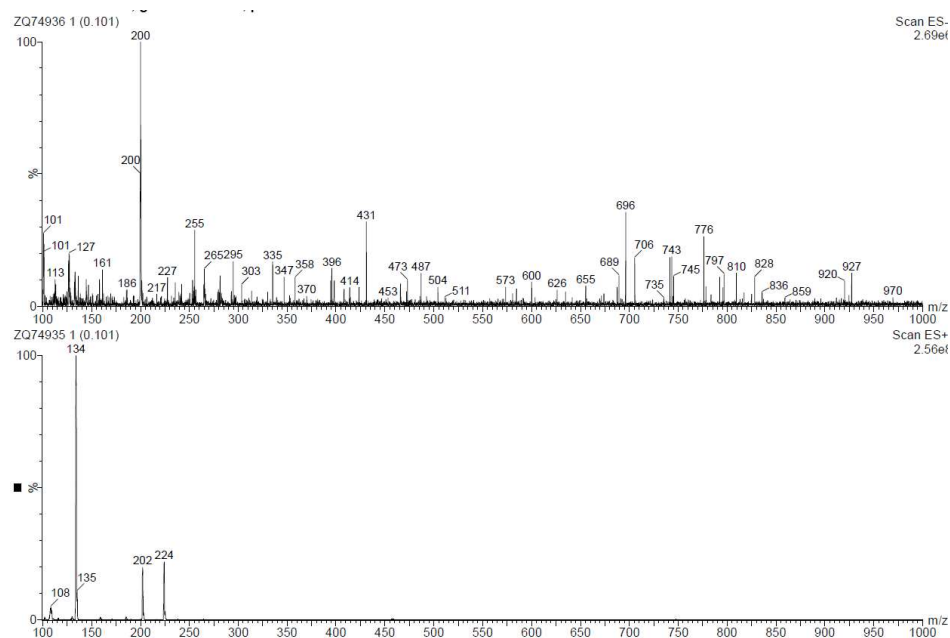

ESI-MS(+) m/z (%): 202 (30) [HL<sup>5</sup>]<sup>+</sup>, 224 (100) [NaL<sup>5</sup>]<sup>+</sup>; ESI-MS(-): 200 (100) [L<sup>5</sup>-H].

**Fig. S19.** ESI-MS spectra for ligand L<sup>6</sup>.

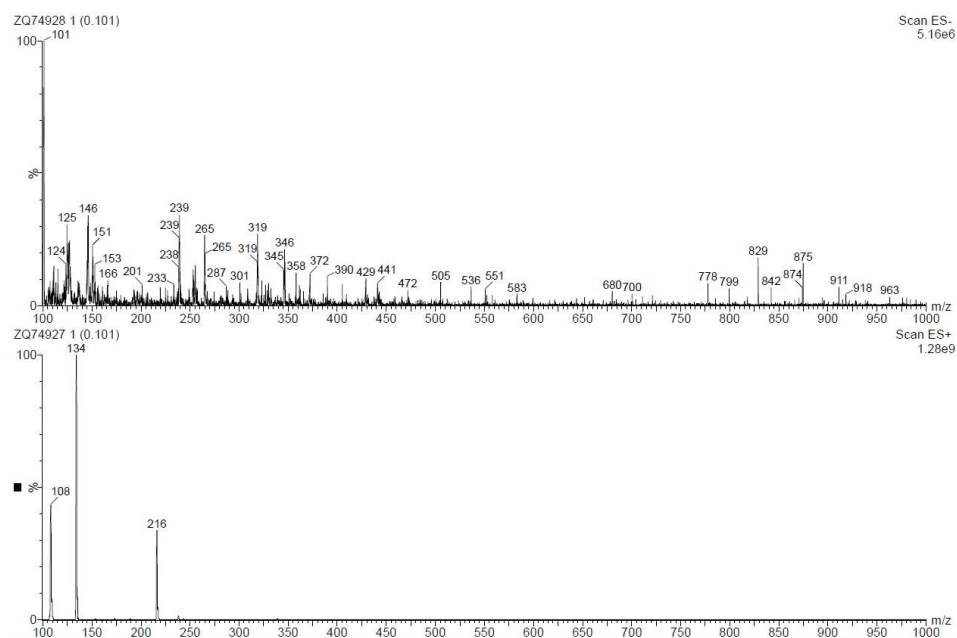

ESI-MS(+) m/z (%): 216 (100) [HL<sup>6</sup>]<sup>+</sup>.

Fig. S20. ESI-MS spectra for complex 1.

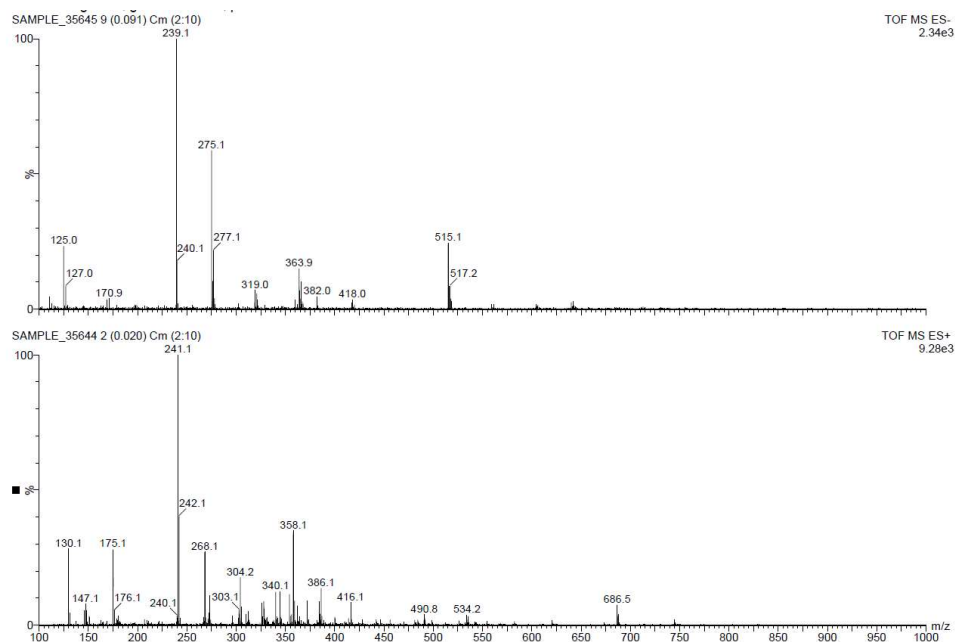

ESI-MS(+) m/z (%): 241 (100) [HL<sup>1</sup>]<sup>+</sup>; ESI-MS(-) m/z (%): 239 (100) [L<sup>1</sup>-H]<sup>-</sup>.

Fig. S21. ESI-MS spectra for complex 2.

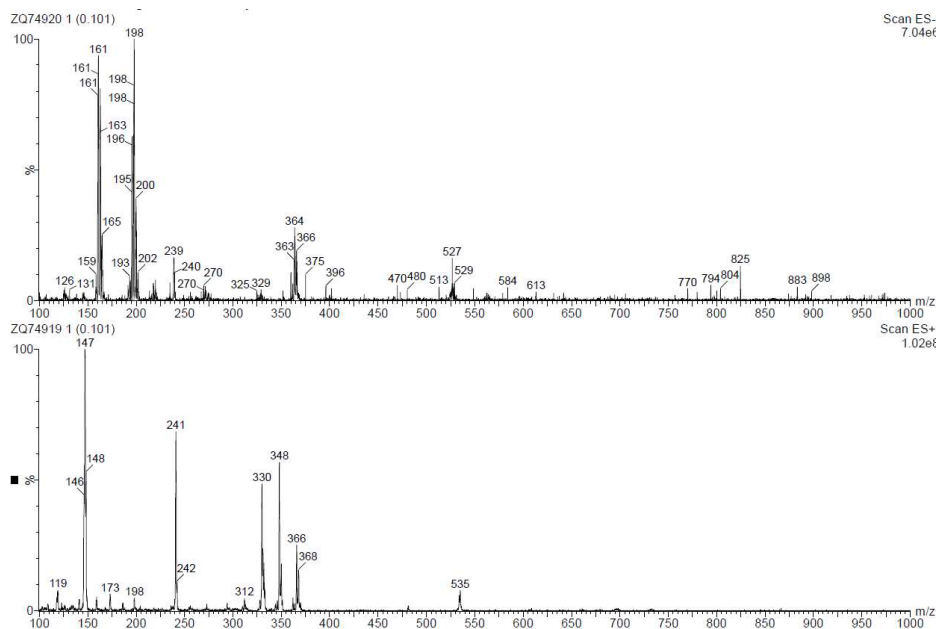

ESI-MS(+) m/z (%): 241 (70) [HL<sup>2</sup>]<sup>+</sup>, 366 (30) [FeL<sup>2</sup>Cl<sub>2</sub>]<sup>+</sup>; ESI-MS(-) m/z (%): 198 (100) [FeCl<sub>4</sub>]<sup>-</sup>.

**Fig. S22.** ESI-MS spectra for complex 3.

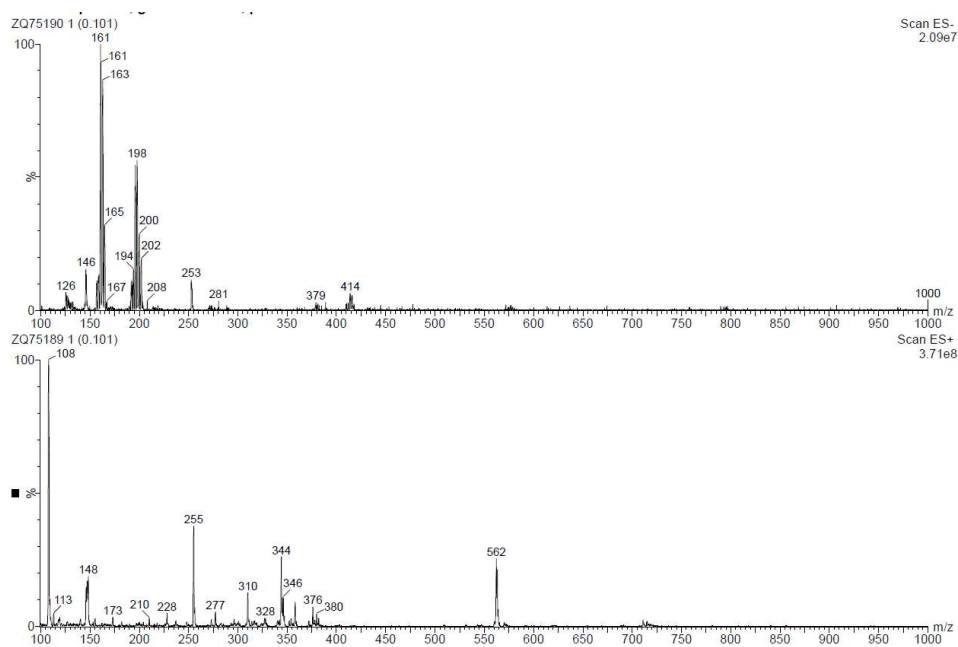

ESI-MS(+) m/z (%): 255 (40) [HL<sup>3</sup>]<sup>+</sup>, 277 (5) [NaL<sup>3</sup>]<sup>+</sup>, 344 (30) [Fe(L<sup>3</sup>-H)Cl]<sup>+</sup>.

**Fig. S23.** ESI-MS spectra for complex 4.

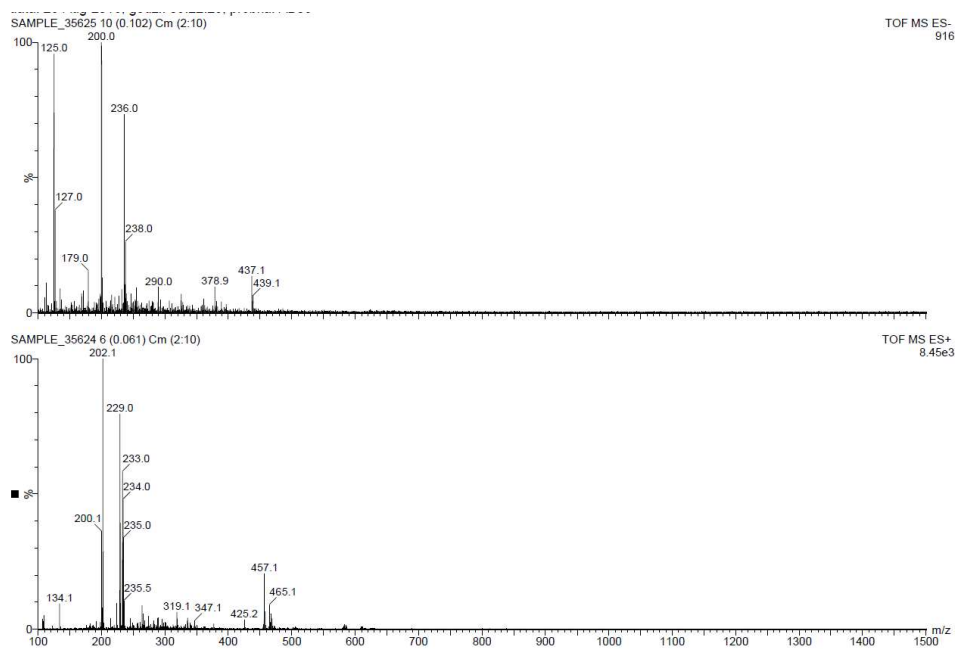

ESI-MS(+) m/z (%): 202 (100) [HL<sup>4</sup>]<sup>+</sup>; ESI-MS(-) m/z (%): 200 (100) [L<sup>4</sup>-H]<sup>-</sup>.

**Fig. S24.** ESI-MS spectra for complex 5.

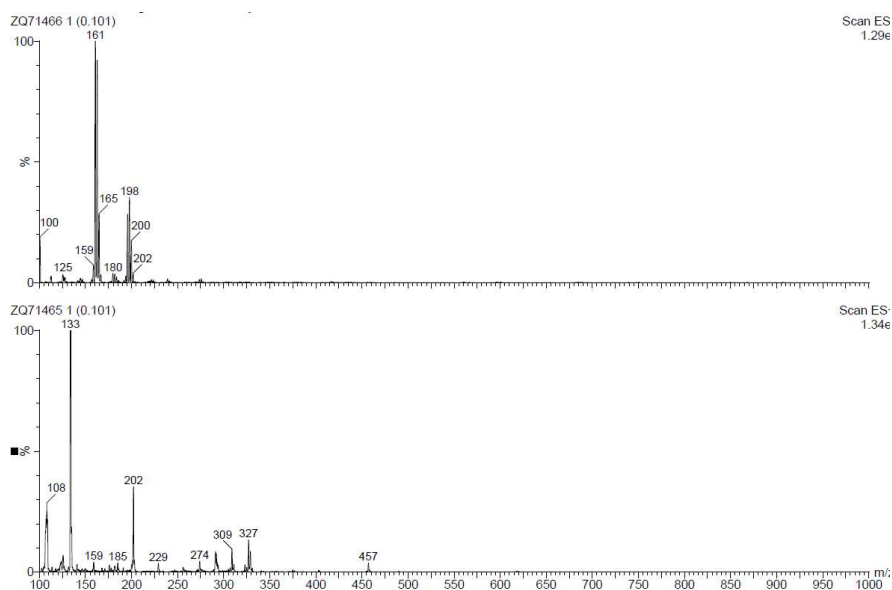

ESI-MS(+) m/z (%): 202 (40) [HL<sup>5+</sup>]<sup>+</sup>, 327 (20) [FeL<sup>5</sup>Cl<sub>2</sub>]<sup>+</sup>; ESI-MS(-) m/z (%): 198 (40) [FeCl<sub>4</sub>]<sup>-</sup>.

**Fig. S25.** ESI-MS spectra for complex 6.

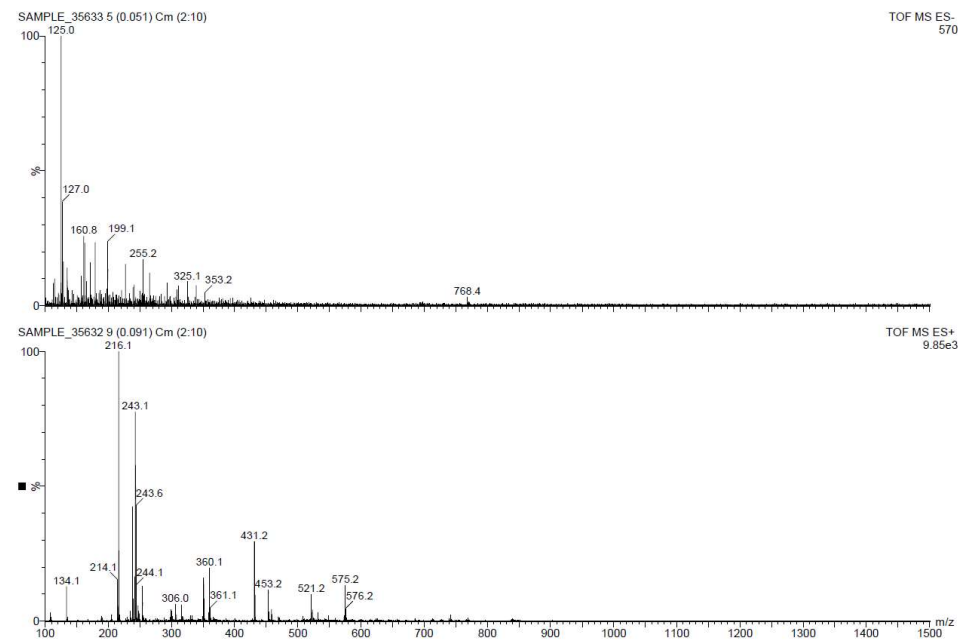

ESI-MS(+) m/z (%): 216 (100) [HL<sup>6+</sup>]<sup>+</sup>.

**Fig. S26.** ESI-MS spectra for complex 7.

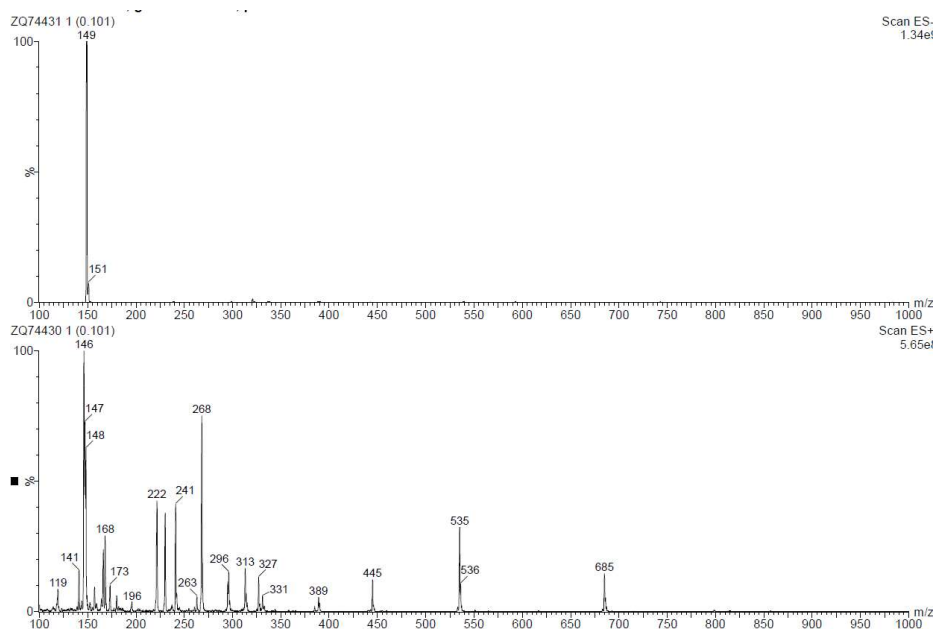

ESI-MS(+) m/z (%): 241 (40) [HL<sup>1</sup>]<sup>+</sup>, 263 (5) [NaL<sup>1</sup>]<sup>+</sup>, 268 (80) [FeL<sub>2</sub>]<sup>2+</sup>, 535 (35) [FeL<sup>1</sup>(L<sup>1</sup>-H)]<sup>+</sup>; ESI-MS(-): 149 (100) [CF<sub>3</sub>SO<sub>3</sub>]<sup>-</sup>.

**Fig. S27.** ESI-MS spectra for complex 8.

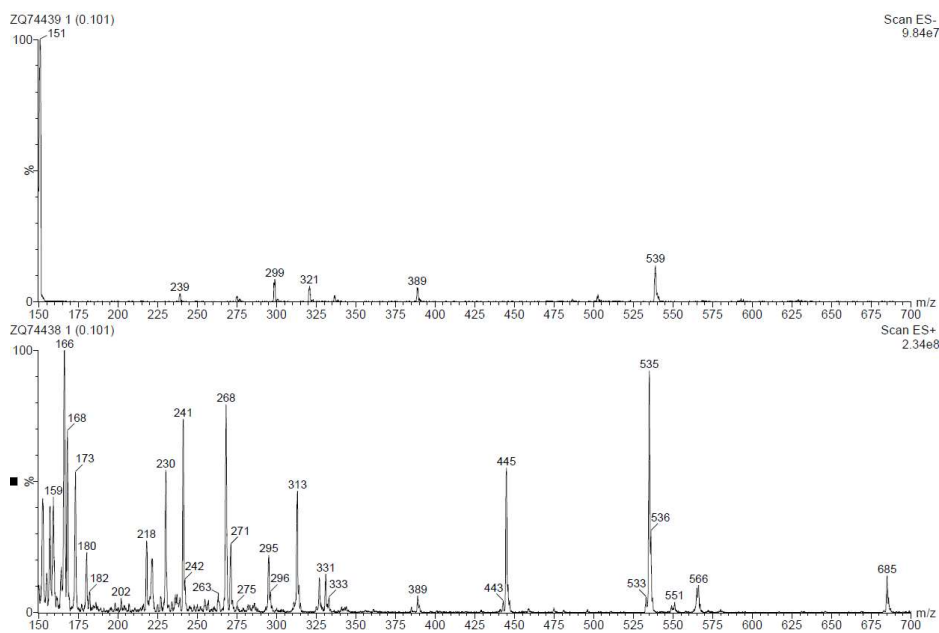

ESI-MS(+) m/z (%): 241 (75) [HL<sup>2</sup>]<sup>+</sup>, 263 (5) [NaL<sup>2</sup>]<sup>+</sup>, 268 (80) [FeL<sub>2</sub>]<sup>2+</sup>, 535 (95) [FeL<sup>2</sup>(L<sup>2</sup>-H)]<sup>+</sup>.



**Fig. S28.** ESI-MS spectra for complex 9.

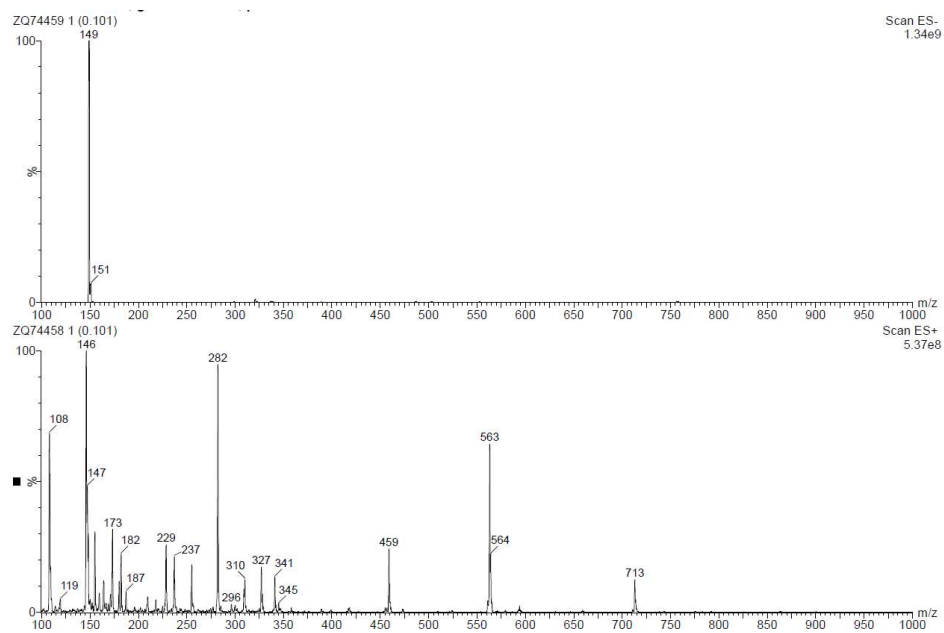

ESI-MS(+) m/z (%): 282 (95)  $[\text{FeL}^3_2]^{2+}$ , 563 (70)  $[\text{FeL}^3(\text{L}^3\text{-H})]^+$ ; ESI-MS(-): 149 (100)  $[\text{CF}_3\text{SO}_3]^-$ .

**Fig. S29.** ESI-MS spectra for complex 10.

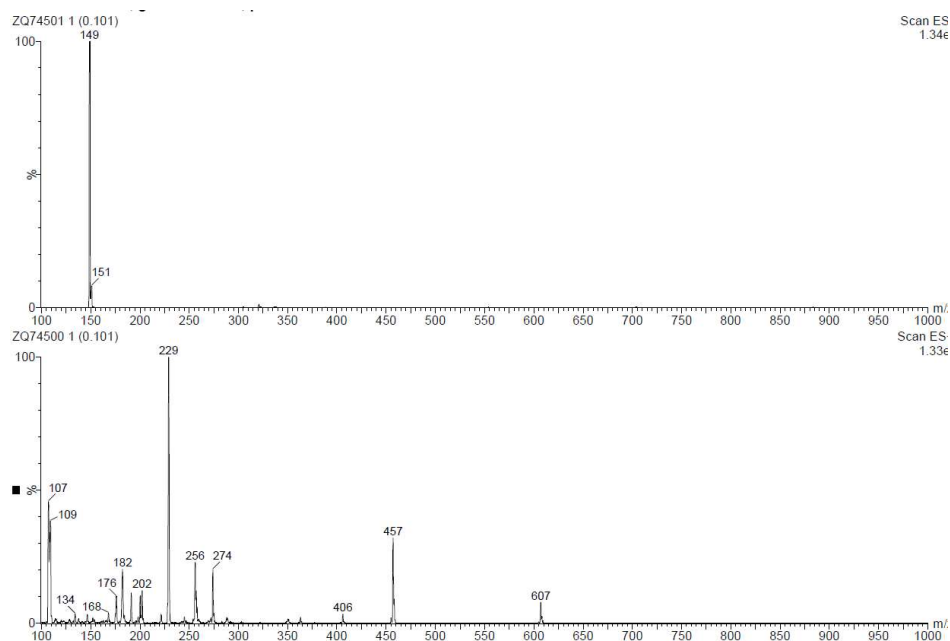

ESI-MS(+) m/z (%): 229 (100)  $[\text{FeL}^4_2]^+$ , 457 (35)  $[\text{FeL}^4(\text{L}^4\text{-H})]^+$ ; ESI-MS(-): 149 (100)  $[\text{CF}_3\text{SO}_3]^-$ .

**Fig. S30.** ESI-MS spectra for complex 11.

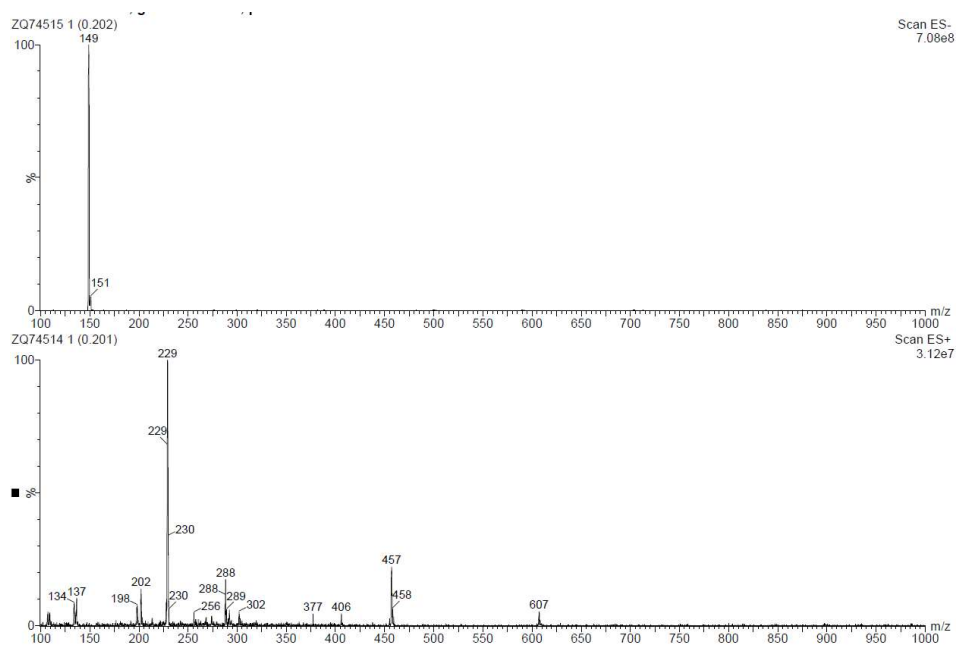

ESI-MS(+) m/z (%): 229 (100)  $[\text{FeL}^5_2]^{2+}$ , 457 (20)  $[\text{FeL}^5(\text{L}^5\text{-H})]^+$ ; ESI-MS(-): 149 (100)  $[\text{CF}_3\text{SO}_3]^-$ .

**Fig. S31.** ESI-MS spectra for complex 12.

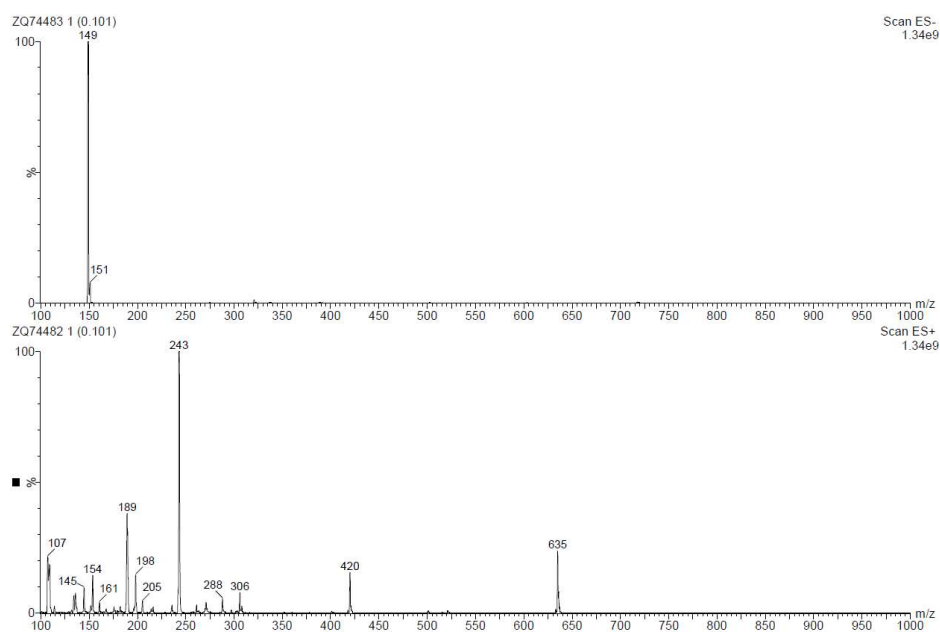

ESI-MS(+) m/z (%): 243 (100)  $[\text{FeL}^6_2]^{2+}$ , 635 (30)  $[\text{FeL}^6_2(\text{CF}_3\text{SO}_3)]^+$ ; ESI-MS(-): 149 (100)  $[\text{CF}_3\text{SO}_3]^-$ .

### 3. Crystal data and structure of complexes

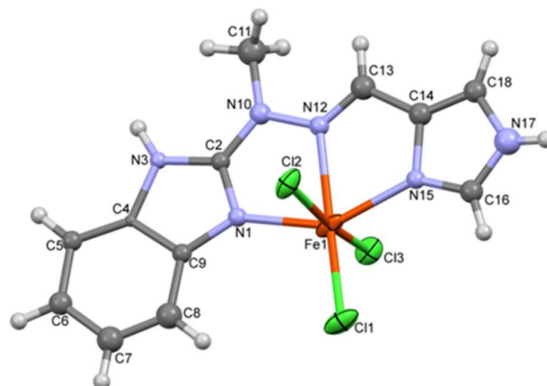

**Fig. S32.** Anisotropic-ellipsoid representation of the complex **1** the ellipsoids are drawn at the 50% probability level, hydrogen atoms are shown as spheres of arbitrary radii.

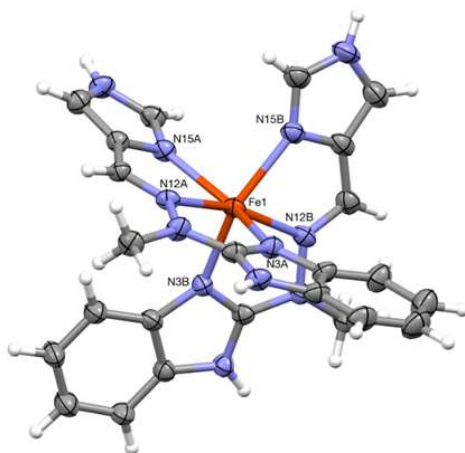

**Fig. S33.** Anisotropic-ellipsoid representation of the complex **7** the ellipsoids are drawn at the 50% probability level, hydrogen atoms are shown as spheres of arbitrary radii.

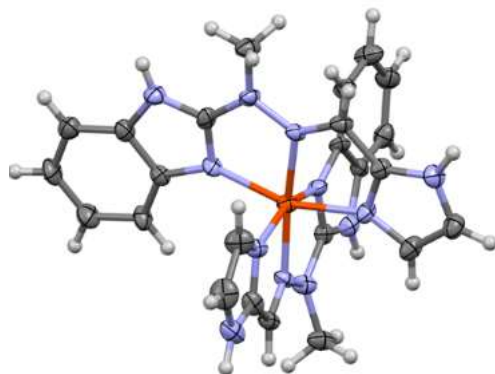

**Fig. S34.** Anisotropic-ellipsoid representation of the complex **8** the ellipsoids are drawn at the 50% probability level, hydrogen atoms are shown as spheres of arbitrary radii.

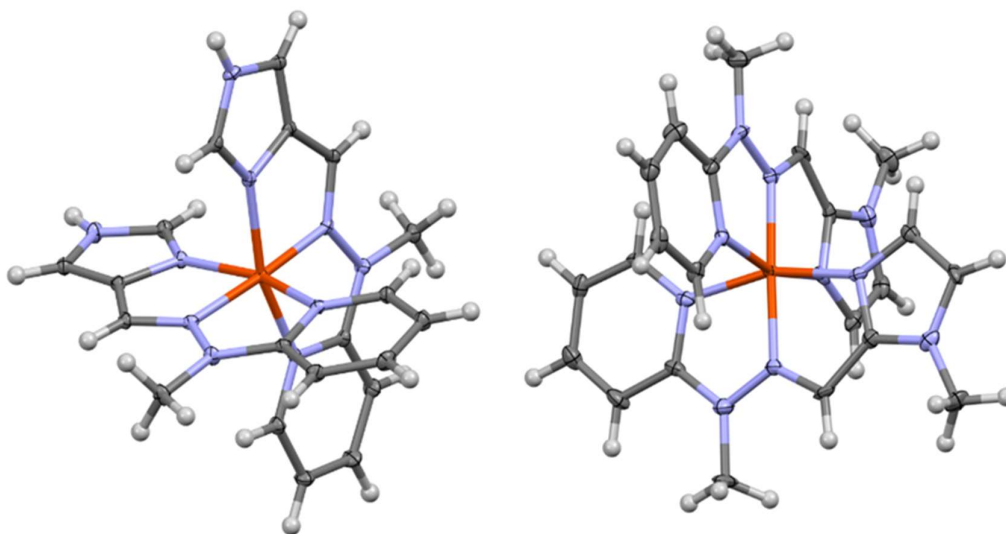

**Fig. S35.** Anisotropic-ellipsoid representation of the complex **10** and **12** the ellipsoids are drawn at the 50% probability level, hydrogen atoms are shown as spheres of arbitrary radii.

**Table S1.** Relevant geometrical data ( $\text{\AA}$ ,  $^\circ$ ); “angles” are three largest angles around Fe center, A, B and C denote mean planes of benzimidazole or pyridine ring, chain linker and imidazole ring, respectively.

|             | <b>1</b>  | <b>2</b>   | <b>4</b>   | <b>6</b>   |
|-------------|-----------|------------|------------|------------|
| Fe1-N3 (N1) | 2.043(15) | 2.0736(19) | 2.137(5)   | 2.1161(18) |
| Fe1-N12     | 2.234(15) | 2.226(2)   | 2.172(5)   | 2.1911(17) |
| Fe1-N15     | 2.090(15) | 2.096(2)   | 2.087(5)   | 2.0786(18) |
| Fe1-Cl      | 2.234(6)  | 2.2518(7)  | 2.2538(17) | 2.2584(6)  |
|             | 2.318(6)  | 2.2883(7)  | 2.3045(17) | 2.3365(6)  |
|             | 2.543(6)  |            | 2.4771(17) | 2.3890(6)  |
| Fe1-O       |           | 2.1217(17) |            |            |
| angles      | 174.7(4)  | 169.43(5)  | 173.34(7)  | 178.07(5)  |
|             | 173.0(2)  | 169.00(6)  | 172.20(15) | 171.30(2)  |
|             | 147.1(6)  | 146.11(8)  | 147.2(2)   | 147.17(7)  |
|             |           |            |            |            |
| A/B         | 7.1(12)   | 2.14(13)   | 7.3(3)     | 6.52(9)    |

|     |         |          |         |          |
|-----|---------|----------|---------|----------|
| B/C | 6.9(15) | 4.50(16) | 8.3(4)  | 3.05(10) |
| A/C | 10.7(9) | 3.80(14) | 10.4(4) | 6.31(12) |

|             | 7          | 8          | 9         | 10         | 12       |
|-------------|------------|------------|-----------|------------|----------|
| Fe1-N3 (N1) | 2.152(3)   | 1.987(5)   | 2.164(2)  | 1.9571(14) | 1.941(7) |
|             | 2.140(3)   | 2.003(5)   | 2.132(2)  |            | 1.956(7) |
| Fe1-N12     | 2.184(3)   | 1.957(4)   | 2.173(3)  | 1.9521(14) | 1.888(6) |
|             | 2.183(3)   | 1.976(4)   | 2.199(3)  |            | 1.891(7) |
| Fe1-N15     | 2.191(3)   | 1.997(5)   | 2.207(3)  | 1.9014(13) | 1.984(7) |
|             | 2.173(3)   | 2.008(5)   | 2.132(2)  |            | 1.996(7) |
| angles      | 166.00(10) | 171.91(18) | 163.79(9) | 1.8988(13) | 177.5(3) |
|             | 145.85(11) | 158.22(19) | 146.17(9) |            | 162.1(3) |
|             | 143.14(11) | 158.13(19) | 146.09(9) |            | 161.9(3) |
|             |            |            |           | 1.9715(14) |          |
| A/B         | 9.55(15)   | 6.7(3)     | 14.05(7)  | 1.9558(14) | 1.9(3)   |
|             | 10.20(14)  | 3.3(3)     | 6.67(9)   |            | 3.4(3)   |
| B/C         | 14.34(17)  | 8.2(4)     | 5.97(12)  | 176.05(6)  | 1.1(3)   |
|             | 8.8(2)     | 3.5(4)     | 7.02(14)  |            | 5.3(3)   |
| A/C         | 15.90(17)  | 6.1(4)     | 17.88(8)  | 161.93(6)  | 1.9(4)   |
|             | 18.69(18)  | 3.1(4)     | 13.55(12) |            | 7.8(4)   |
| A/A'        | 86.41(7)   | 83.36(10)  | 74.65(6)  | 161.82(6)  | 88.3(2)  |
| Voids       | 17.0       | 12.4       | 14.4      |            | 5.8      |

**Table S2.** Hydrogen bond data (Å, °)

| D        | H   | A                 | D-H  | H...A | D...A     | D-H...A |
|----------|-----|-------------------|------|-------|-----------|---------|
| <b>1</b> |     |                   |      |       |           |         |
| N3       | H3  | Cl2 <sup>i</sup>  | 0.88 | 2.37  | 3.145(16) | 147     |
| N17      | H17 | Cl2 <sup>ii</sup> | 0.88 | 2.41  | 3.203(18) | 151     |
| <b>2</b> |     |                   |      |       |           |         |

|           |      |                     |      |      |            |     |
|-----------|------|---------------------|------|------|------------|-----|
| N3        | H3   | Cl3 <sup>i</sup>    | 0.88 | 2.21 | 3.083(2)   | 174 |
| N18       | H18  | Cl3 <sup>iii</sup>  | 0.88 | 2.24 | 3.051(2)   | 154 |
| O19       | H19  | Cl3                 | 0.86 | 2.10 | 2.9431(18) | 171 |
| <b>4</b>  |      |                     |      |      |            |     |
| N14       | H14  | Cl3 <sup>iv</sup>   | 0.88 | 2.44 | 3.179(6)   | 142 |
| <b>7</b>  |      |                     |      |      |            |     |
| N1A       | H1A  | O2C <sup>vi</sup>   | 0.88 | 2.04 | 2.906(4)   | 166 |
| N17A      | H17A | O3C                 | 0.88 | 1.93 | 2.812(4)   | 175 |
| N1B       | H1B  | O3D                 | 0.88 | 2.02 | 2.895(4)   | 173 |
| N17B      | H17B | O2D <sup>vii</sup>  | 0.88 | 2.05 | 2.914(4)   | 165 |
| <b>8</b>  |      |                     |      |      |            |     |
| N1A       | H1A  | O2D <sup>viii</sup> | 0.88 | 2.16 | 2.904(6)   | 142 |
| N18A      | H18A | O3C                 | 0.88 | 2.26 | 2.856(7)   | 125 |
| N18A      | H18A | O3D                 | 0.88 | 2.28 | 3.007(6)   | 140 |
| N1B       | H1B  | O1D <sup>ix</sup>   | 0.88 | 1.97 | 2.833(6)   | 166 |
| N18B      | H18B | O3D <sup>x</sup>    | 0.88 | 2.09 | 2.961(6)   | 173 |
| <b>9</b>  |      |                     |      |      |            |     |
| N1A       | H1A  | O3C <sup>xi</sup>   | 0.88 | 1.97 | 2.814(3)   | 161 |
| N1B       | H1B  | O3D <sup>xii</sup>  | 0.88 | 2.03 | 2.896(3)   | 166 |
| <b>10</b> |      |                     |      |      |            |     |
| N14A      | H14A | O2D                 | 0.88 | 1.98 | 2.862(7)   | 179 |
| N14B      | H14B | O3C                 | 0.88 | 1.95 | 2.811(7)   | 165 |
| <b>12</b> |      |                     |      |      |            |     |
| C6A       | H6A  | O1E                 | 0.95 | 2.35 | 3.196(12)  | 148 |
| C10C      | H10C | O3H <sup>xiii</sup> | 0.95 | 2.23 | 3.158(11)  | 167 |
| C6D       | H6D  | F2F                 | 0.95 | 2.23 | 2.937(13)  | 130 |

Symmetrycodes: <sup>i</sup> 1-x,-1-y,1-z; <sup>ii</sup> 1-x,-y,2-z; <sup>iii</sup> 3/2-x,1/2+y,1/2-z; <sup>iv</sup> -x,1-y,1-z;

<sup>v</sup> -1+x,y,z; <sup>vi</sup> 1/2+x,1/2+y, z; <sup>vii</sup> -1/2+x,1/2+y,z; <sup>viii</sup> 1-x,1/2+y,3/2-z; <sup>ix</sup> x,1+y,z;

<sup>x</sup> -x,1/2+y,3/2-z; <sup>xi</sup> -1+x,y,z; <sup>xii</sup>; <sup>xiii</sup> 2-x,1-y,1-z.

**Table S3.** Comparative table of ligands structure and features with some of their kinetic parameters.

| Ligand                                                                              | 'Open'                                                                                                       | 'Closed'                                                                                                                     | Number of H bonds in: |                   |                     | Dispositi<br>on of H<br>bonds |
|-------------------------------------------------------------------------------------|--------------------------------------------------------------------------------------------------------------|------------------------------------------------------------------------------------------------------------------------------|-----------------------|-------------------|---------------------|-------------------------------|
|                                                                                     | [Fe(L <sup>x</sup> )Cl <sub>3</sub> ]<br><br>K <sub>M</sub> [10 <sup>-3</sup> M) /<br>TON [h <sup>-1</sup> ] | [Fe(L <sup>x</sup> ) <sub>2</sub> ](OTf) <sub>2</sub><br><br>K <sub>M</sub> [10 <sup>-3</sup> M) /<br>TON [h <sup>-1</sup> ] | Ligand                | 'Open'<br>complex | 'Closed'<br>complex |                               |
| 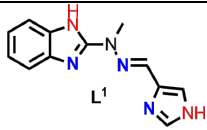 | 1.45 /<br>185.25                                                                                             | 3.98 /<br>199.40                                                                                                             | 2                     | 2                 | 4                   | a/e                           |
|  | 2.16 /<br>127.30                                                                                             | 1.96 /<br>97.68                                                                                                              | 2                     | 2                 | 4                   | a/a                           |

|                                                                                   |                  |                  |   |   |   |     |
|-----------------------------------------------------------------------------------|------------------|------------------|---|---|---|-----|
| 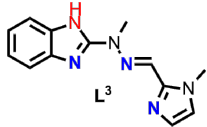 | 1.95 /<br>172.30 | 3.68 /<br>183.80 | 1 | 1 | 2 | a/- |
|  | 2.02 /<br>134.05 | 0.86 /<br>42.76  | 1 | 1 | 2 | -/e |
|  | 2.02 /<br>103.34 | 1.30 /<br>65.14  | 1 | 1 | 2 | -/a |
|  | 2.19 /<br>150.49 | 2.13 /<br>106.53 | 0 | 0 | 0 | -/- |

## 4. Spectra of the oxidation reactions

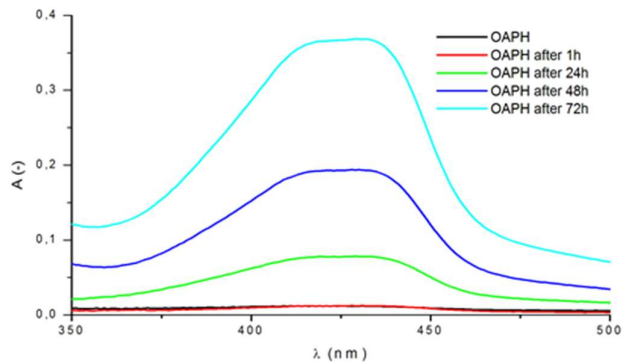

**Fig. S36.** The spectral profile showing blank test with 2-aminophenol dissolved in methanol. The spectra were recorded under aerobic conditions during three days. At 433 nm there is growth of 2-aminophenoxazine-3-one.

The spectra of the oxidation reaction of 2-aminophenol using complexes with a “open” system as catalysts:

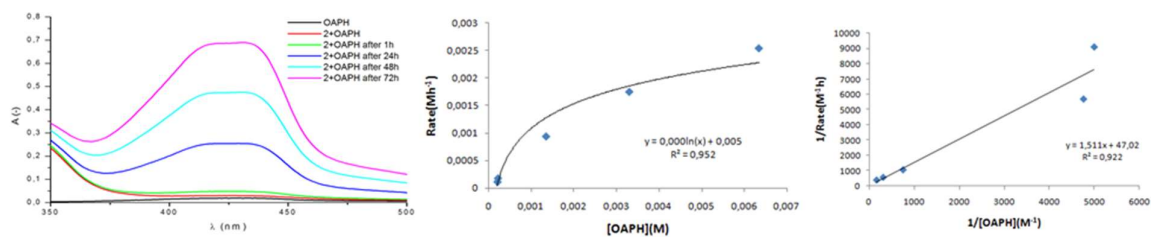

**Fig. S37.** The spectral profile showing the growth of 2-aminophenoxazine-3-one at 433 nm due to addition of complex 2 to 2-aminophenol dissolved in methanol. The spectra were recorded under aerobic conditions during three days (left). Plot of rate vs concentration for complex 2 (middle). Lineweaver-Burk plot of phenoxazinone synthase like activity for complex 2 (right).

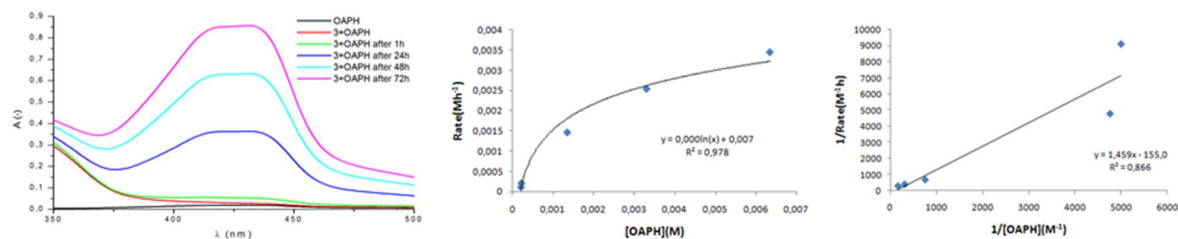

**Fig. S38.** The spectral profile showing the growth of 2-aminophenoxazine-3-one at 433 nm due to addition of complex 3 to 2-aminophenol dissolved in methanol. The spectra were recorded under aerobic conditions during three days (left). Plot of rate vs concentration for complex 3 (middle). Lineweaver-Burk plot of phenoxazinone synthase like activity for complex 3 (right).



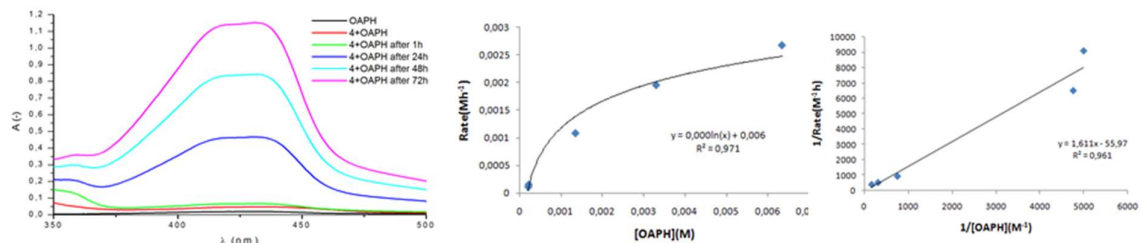

**Fig. S39.** The spectral profile showing the growth of 2-aminophenoxazine-3-one at 433 nm due to addition of complex 4 to 2-aminophenol dissolved in methanol. The spectra were recorded under aerobic conditions during three days (left). Plot of rate vs concentration for complex 4 (middle). Lineweaver-Burk plot of phenoxazinone synthase like activity for complex 4 (right).

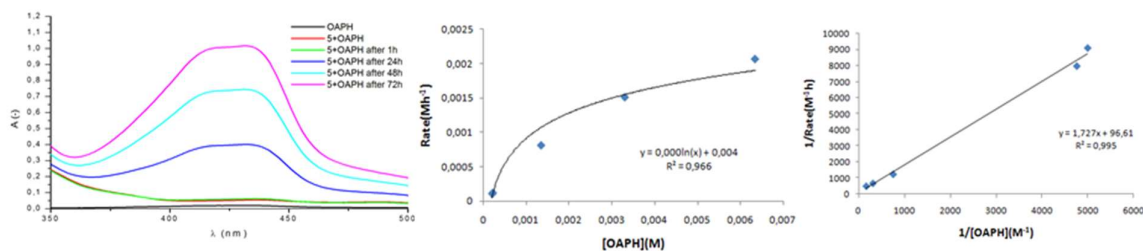

**Fig. S40.** The spectral profile showing the growth of 2-aminophenoxazine-3-one at 433 nm due to addition of complex 5 to 2-aminophenol dissolved in methanol. The spectra were recorded under aerobic conditions during three days (left). Plot of rate vs concentration for complex 5 (middle). Lineweaver-Burk plot of phenoxazinone synthase like activity for complex 5 (right).

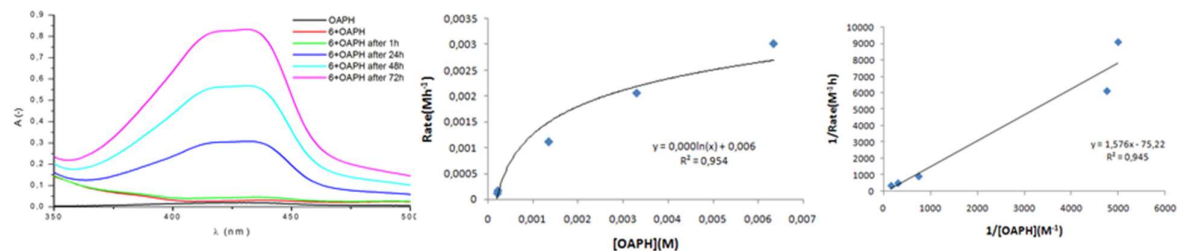

**Fig. S41.** The spectral profile showing the growth of 2-aminophenoxazine-3-one at 433 nm due to addition of complex 6 to 2-aminophenol dissolved in methanol. The spectra were recorded under aerobic conditions during three days (left). Plot of rate vs concentration for complex 6 (middle). Lineweaver-Burk plot of phenoxazinone synthase like activity for complex 6 (right).

The spectra of the oxidation reaction of 2-aminophenol using complexes with a “closed” system as catalysts:

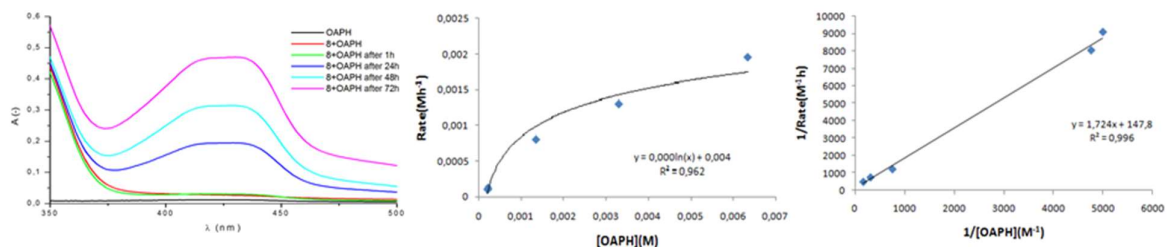

**Fig. S42.** The spectral profile showing the growth of 2-aminophenoxazine-3-one at 433 nm due to addition of complex **8** to 2-aminophenol dissolved in methanol. The spectra were recorded under aerobic conditions during three days (left). Plot of rate vs concentration for complex **8** (middle). Lineweaver-Burk plot of phenoxazinone synthase like activity for complex **8** (right).

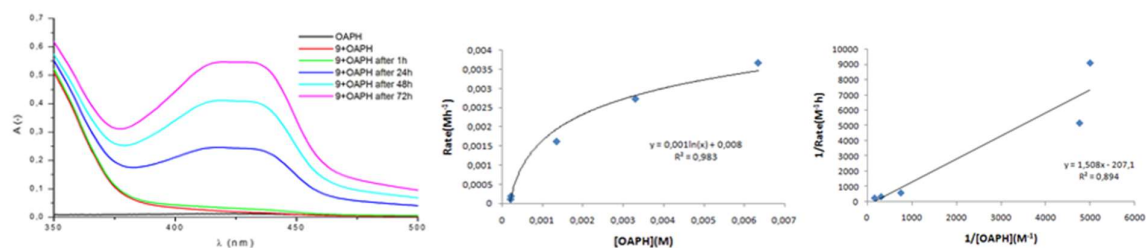

**Fig. S43.** The spectral profile showing the growth of 2-aminophenoxazine-3-one at 433 nm due to addition of complex **9** to 2-aminophenol dissolved in methanol. The spectra were recorded under aerobic conditions during three days (left). Plot of rate vs concentration for complex **9** (middle). Lineweaver-Burk plot of phenoxazinone synthase like activity for complex **9** (right).

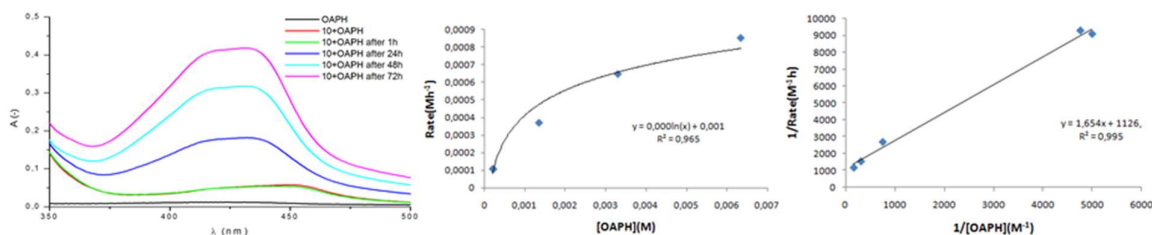

**Fig. S44.** The spectral profile showing the growth of 2-aminophenoxazine-3-one at 433 nm due to addition of complex **10** to 2-aminophenol dissolved in methanol. The spectra were recorded under aerobic conditions during three days (left). Plot of rate vs concentration for complex **10** (middle). Lineweaver-Burk plot of phenoxazinone synthase like activity for complex **10** (right).

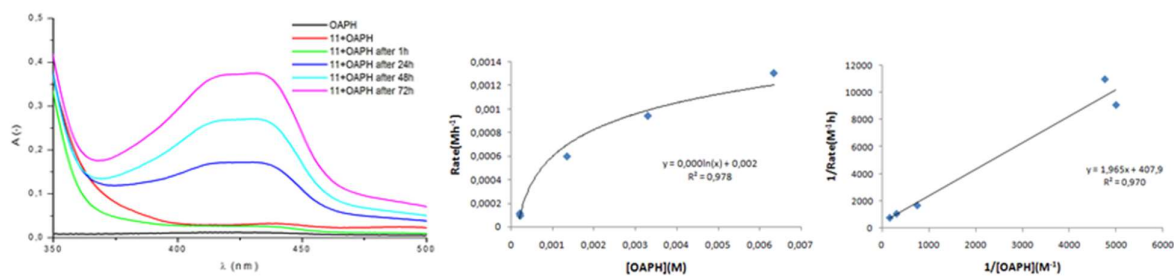

**Fig. S45.** The spectral profile showing the growth of 2-aminophenoxazine-3-one at 433 nm due to addition of complex **11** to 2-aminophenol dissolved in methanol. The spectra were recorded under aerobic conditions during three days (left). Plot of rate vs concentration for complex **11** (middle). Lineweaver-Burk plot of phenoxazinone synthase like activity for complex **11** (right).

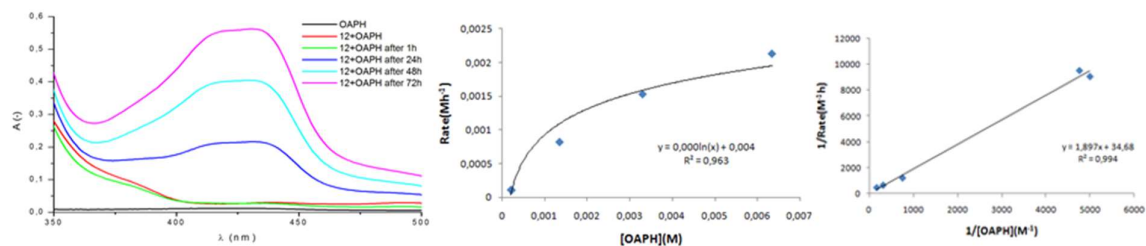

**Fig. S46.** The spectral profile showing the growth of 2-aminophenoxazine-3-one at 433 nm due to addition of complex **12** to 2-aminophenol dissolved in methanol. The spectra were recorded under aerobic conditions during three days (left). Plot of rate vs concentration for complex **12** (middle). Lineweaver-Burk plot of phenoxazinone synthase like activity for complex **12** (right).

## 5. Biological spectra

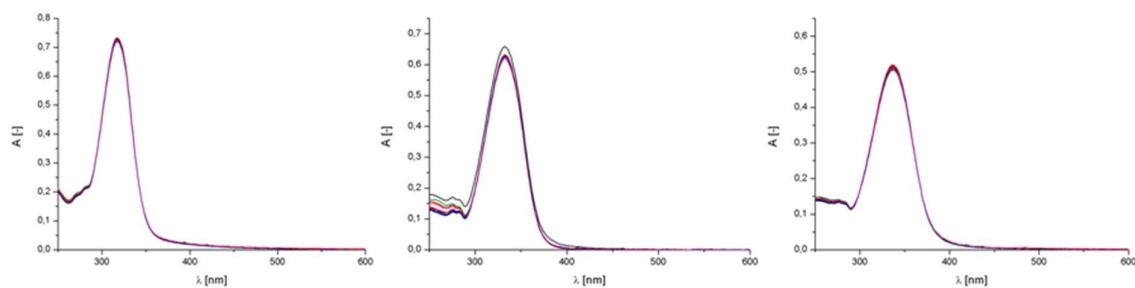

**Fig. S47.** Absorption titration of **1** (left), **2** (middle) and **3** (right) with increasing concentrations of CT-DNA (0-100  $\mu$ M).

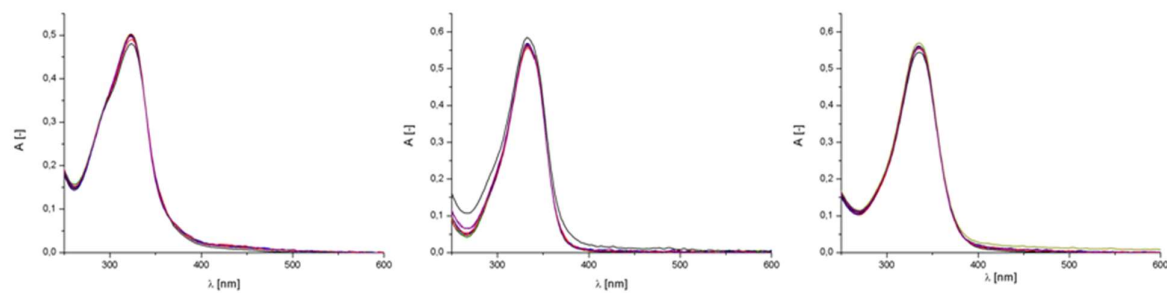

**Fig. S48.** Absorption titration of **4** (left), **5** (middle) and **6** (right) with increasing concentrations of CT-DNA (0-100  $\mu$ M).

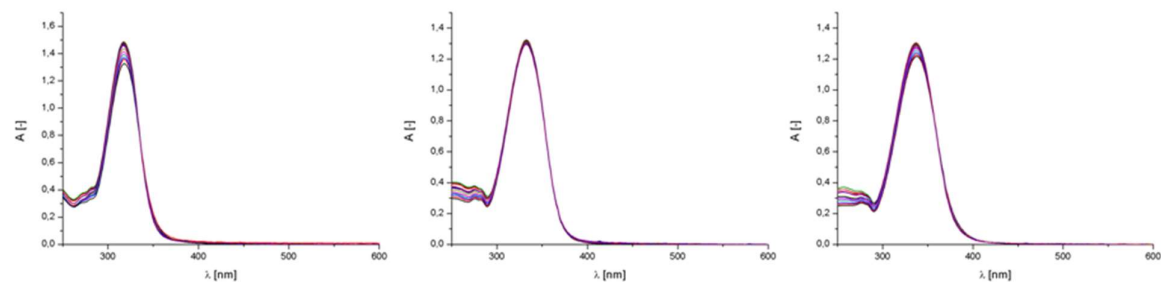

**Fig. S49.** Absorption titration of **7** (left), **8** (middle) and **9** (right) with increasing concentrations of CT-DNA (0-100  $\mu$ M).

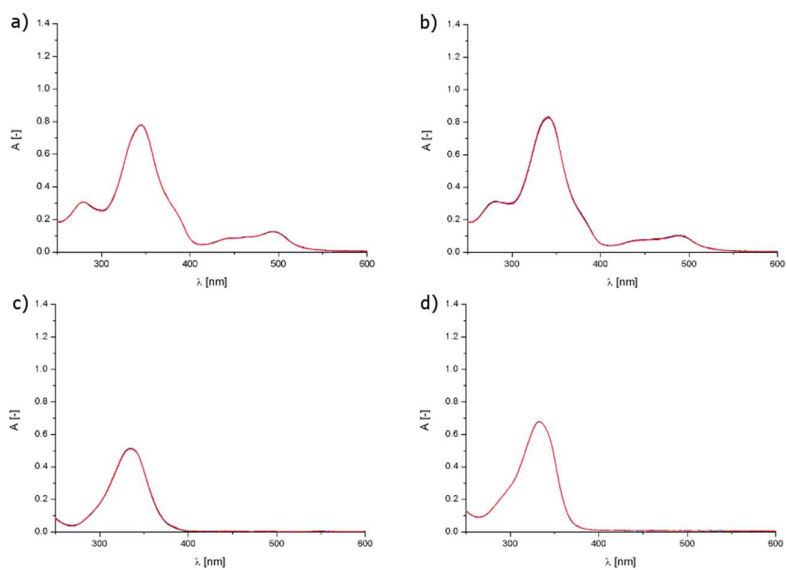

**Fig. S50.** Stability test of complex compounds **12** (a), **11** (b) and ligands **L<sup>6</sup>** (c), **L<sup>5</sup>** (d) over time (0-420min).

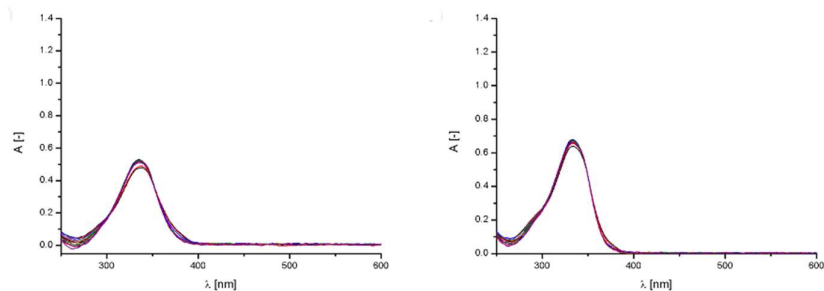

**Fig. S51** Absorption titration of **L<sup>6</sup>** (left) and **L<sup>5</sup>** (right) with increasing concentrations of CT-DNA (0-100  $\mu$ M).

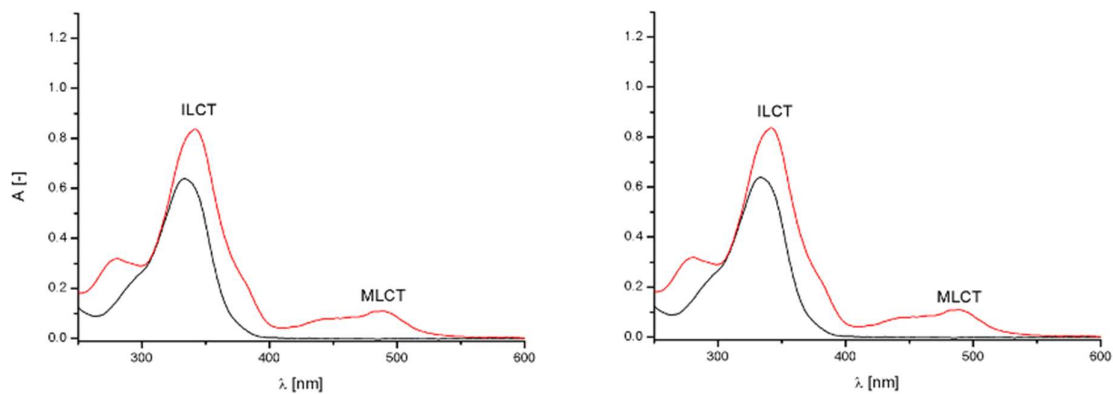

**Fig. S52** Absorption spectra of **L<sup>6</sup>** and **12** (left), **L<sup>5</sup>** and **11** (right) in Tris-HCl buffer (pH=7.4).
